1 **A significant role for the circadian clock in the long-term water use efficiency of**  
2 **Arabidopsis**

3

4 Noriane M. L. Simon, Nicholas E. Comben, Alistair M. Hetherington, Antony N. Dodd\*

5

6 School of Biological Sciences, University of Bristol, Life Sciences Building, Bristol BS8 1TQ,  
7 U.K.

8

9 \* Corresponding author, [antony.dodd@bristol.ac.uk](mailto:antony.dodd@bristol.ac.uk)

10

11

12 Word count (body text including methods): 5374

13

14 **Short title:** Circadian regulation and water use efficiency

15

16 **Author contributions:** N.M.L.S. and A.N.D. conceived experiments, N.M.L.S. and N.E.C.  
17 performed experiments, N.M.L.S., A.M.H. and A.N.D. analysed and interpreted the data,  
18 N.M.L.S., A.M.H. and A.N.D. wrote the paper. A.N.D. agrees to serve as the author  
19 responsible for contact and ensures communication.

20

21 **One-sentence summary:** The circadian clock in Arabidopsis makes an important  
22 contribution to long-term water use efficiency.

23

## 24 **Abstract**

25 In plants, water use efficiency is a complex trait derived from numerous physiological and  
26 developmental characteristics. Here, we investigated the involvement of circadian regulation  
27 in long-term water use efficiency. Circadian rhythms are generated by the circadian  
28 oscillator, which provides a cellular measure of the time of day. In plants, the circadian  
29 oscillator contributes to the regulation of many aspects of physiology, including stomatal  
30 opening, the rate of photosynthesis, carbohydrate metabolism and developmental  
31 processes. We investigated in *Arabidopsis* the impact upon whole plant, long-term water use  
32 efficiency of the misregulation of genes encoding a large number of components of the  
33 circadian oscillator, identifying a major role for the circadian oscillator in plant water use.  
34 This appears to be due to contributions of the circadian clock to the control of transpiration  
35 and biomass accumulation. We also identified that the circadian oscillator specifically within  
36 guard cells contributes to both long-term water use efficiency and dehydration tolerance. Our  
37 experiments indicate that knowledge of circadian regulation will be important for developing  
38 future crops that use less water.

39

## 40 **Introduction**

41 World population growth is increasing the demand for fresh water for agriculture, with  
42 climate change predicted to exacerbate this competition for water resources (Ruggiero et al.,  
43 2017). One strategy to sustainably increase agricultural production involves the  
44 improvement of crop water use (Condon et al., 2004; Xoconostle-Cazares et al., 2010; Hu  
45 and Xiong, 2014; Ruggiero et al., 2017). Since up to 97% of water taken up from the soil by  
46 plants is lost through stomatal transpiration (Yoo et al., 2009; Na and Metzger, 2014), the  
47 manipulation of transpiration represents an excellent candidate for designing crops with  
48 increased water use efficiency.

49 Plant water loss can be manipulated through changes in the regulation of stomatal opening  
50 and by altering stomatal density and patterning (Pei et al., 1998; Hugouvieux et al., 2001;  
51 Schroeder et al., 2001; Hetherington and Woodward, 2003; Yoo et al., 2010; Lawson and  
52 Blatt, 2014; Franks et al., 2015; Caine et al., 2019). In addition to stomatal responses to  
53 environmental cues such as light, temperature and phytohormones, there are circadian  
54 rhythms of stomatal opening (Gorton et al., 1989; Hennessey and Field, 1991). Circadian  
55 rhythms are self-sustaining biological cycles with a period of about 24 h. These rhythms are  
56 thought to adapt plants to daily cycles of light and dark, by anticipating daily changes in the  
57 environment and co-ordinating cellular processes. In higher plants, circadian rhythms are  
58 generated by several interlocked transcription-translation feedback loops known as the  
59 circadian oscillator (Hsu and Harmer, 2014). The phase of the circadian oscillator is adjusted  
60 continuously to match the phase of the environment through the process of entrainment, in  
61 response to light, temperature and metabolic cues (Somers et al., 1998; Millar, 2004;  
62 Salomé and McClung, 2005; Haydon et al., 2013). Additionally, the circadian oscillator  
63 communicates an estimate of the time of day to circadian-regulated features of the cell,  
64 initially through transcriptional regulation (Harmer et al., 2000). The known circadian  
65 oscillator controls circadian rhythms of stomatal opening because mutations that alter the  
66 circadian period or cause circadian arrhythmia lead to equivalent alterations in the circadian  
67 rhythm of stomatal opening (Somers et al., 1998; Dodd et al., 2004; Dodd et al., 2005). The  
68 circadian oscillator is also involved in the responses of guard cells to environmental cues  
69 such as drought and low temperature (Dodd et al., 2006; Legnaioli et al., 2009).

70 Circadian rhythms are often studied under conditions of constant light. However, the  
71 circadian oscillator is also important for the regulation of stomatal opening under cycles of  
72 light and dark. For example, overexpression of the circadian oscillator component CCA1  
73 (CCA1-ox) alters the daily regulation of stomatal opening such that stomatal conductance  
74 increases steadily throughout the photoperiod (Dodd et al., 2005). In comparison, in wild  
75 type plants stomatal conductance remains relatively uniform during the photoperiod and is

76 substantially lower than CCA1-ox (Dodd et al., 2005). This suggests that misregulation of the  
77 circadian oscillator might alter plant water use under cycles of light and dark.

78 Overexpression of CCA1 specifically within guard cells, using a guard cell specific promoter,  
79 alters flowering time and drought response phenotypes under cycles of light and dark  
80 (Hassidim et al., 2017). Like constitutive CCA1 overexpression (Dodd et al., 2005), CCA1  
81 overexpression specifically within guard cells generally causes greater stomatal opening  
82 during the light period (Hassidim et al., 2017). Therefore, the circadian oscillator within guard  
83 cells is important for the daily regulation of stomatal opening (Hassidim et al., 2017).

84 Modelling suggests that under light/dark cycles, the circadian oscillator contributes at the  
85 canopy scale to daily rhythms in stomatal aperture and carbon assimilation in bean and  
86 cotton (Resco de Dios et al., 2016).

87 The contribution of the circadian oscillator to both stomatal opening and growth and biomass  
88 accumulation (Dodd et al., 2005; Graf et al., 2010) suggests that the circadian oscillator  
89 might make an important contribution to water use efficiency (WUE). WUE is the ratio of  
90 carbon dioxide incorporated through photosynthesis into biomass to the amount of water lost  
91 through transpiration. At the single leaf level, instantaneous, intrinsic WUE is often  
92 measured with gas exchange techniques and expressed as net CO<sub>2</sub> assimilation per unit of  
93 water transpired (Violet-Chabrand et al., 2016; Ruggiero et al., 2017; Ferguson et al., 2018).  
94 However, such measurements do not provide an accurate representation of WUE over the  
95 plant lifetime, which is influenced by features such as leaf position, dark respiration, and time  
96 of day changes in instantaneous WUE (Condon et al., 2004; Tomás et al., 2014; Medrano et  
97 al., 2015; Ferguson et al., 2018). It is important to note that WUE is not a drought resistance  
98 trait (Blum, 2009).

99 Given that the circadian oscillator affects stomatal opening and biomass accumulation  
100 (Gorton et al., 1989; Hennessey and Field, 1991; Dodd et al., 2005; Edwards and Weinig,  
101 2010; Graf et al., 2010; Edwards et al., 2012), we hypothesized that specific components of  
102 the circadian oscillator might make an important contribution to long-term WUE of plants.

103 Therefore, we investigated the impact of the misregulation of parts of the circadian oscillator  
104 upon the long-term WUE of Arabidopsis. We identified that the circadian oscillator has  
105 profound effects upon the long-term WUE of plants. Importantly, some alterations in  
106 oscillator function increase long-term WUE, suggesting potential targets for future  
107 improvements of crop WUE.

## 108 **Results**

### 109 *Circadian oscillator components contribute to water use efficiency*

110 Each background accession had a distinct WUE (C24:  $3.01 \pm 0.07$  mg ml<sup>-1</sup>; Col-0:  $2.22 \pm$   
111  $0.02$  mg ml<sup>-1</sup>; *L. er.*:  $1.60 \pm 0.04$  mg ml<sup>-1</sup>; *Ws*:  $1.91 \pm 0.06$  mg ml<sup>-1</sup>) (Fig. S1). These  
112 differences between backgrounds are consistent with previous studies of WUE, stomatal  
113 function and stomatal density in Arabidopsis (Nienhuis et al., 1994; Woodward et al., 2002;  
114 Dodd et al., 2004; Masle et al., 2005; Karaba et al., 2007; Ruggiero et al., 2017; Ferguson et  
115 al., 2018).

116 We identified that correct regulation of the circadian oscillator makes a substantial  
117 contribution to WUE. 33 single mutants or overexpressors of genes associated with  
118 circadian regulation, representing 22 circadian oscillator-associated components, were  
119 screened for WUE (Fig. 1). Nearly half of the mutants or overexpressors examined had a  
120 significantly different WUE from the wild type ( $p < 0.05$ ; 16 of 33 genotypes). This  
121 corresponded to mutants or overexpressors representing half of the circadian oscillator  
122 components covered by our study (11 of 22 genes) (Fig. 1). The *cca1-11*, *elf3-1*, *prr5-3*,  
123 *prr9-1*, *tps1-11*, *tps1-12*, and *ztl-1* mutants, as well as the TOC1 and KIN10 (line 6.5)  
124 overexpressors, had significantly lower WUE than the wild type (Fig. 1). The *gi-2*, *gi-11*,  
125 *grp7-1*, *prr7-11* and *tej-1* mutants had significantly greater WUE than the wild type (Fig. 1).  
126 This suggests that misregulating the expression of circadian clock components CCA1, ELF3,  
127 GI, GRP7, PRR5, PRR7, PRR9, TEJ, TOC1 and ZTL changes whole plant long-term WUE  
128 (Fig. 1). *tic-2* had significantly greater WUE than the wild type, whereas *tic-1* had  
129 significantly lower WUE than the wild type, so the effect of *TIC* mutation upon WUE is

130 unclear (Fig. 1). We also included the *che-2* mutant in our initial analysis, but inconsistency  
131 of its WUE phenotype between experimental repeats led us to exclude the data. WUE was  
132 also altered by changing the expression of the energy signalling components TPS1 and  
133 KIN10 that participate in inputs to the circadian oscillator (Shin et al., 2017; Frank et al.,  
134 2018) (Fig. 1). Therefore, correct expression of these circadian clock-associated genes  
135 contributes to long-term WUE of Arabidopsis.

136 We were interested to determine whether the WUE alterations caused by misregulation of  
137 circadian oscillator gene expression arose from changes in either biomass accumulation or  
138 transpiration. There was no clear evidence that a change in one of these parameters alone  
139 underlies the altered WUE phenotypes (Fig. 2A). This suggests that the altered WUE of lines  
140 with misregulated circadian clock genes is due to the net effect of altered biomass  
141 accumulation and altered transpiration in these genotypes (Fig. 2A).

142 We hypothesised that variations in WUE might be explained by specific circadian  
143 phenotypes in the mutants and overexpressors that we tested. For example, mutations in  
144 clock genes expressed with a particular set of phases might have a pronounced effect on  
145 WUE. Likewise, the nature of the circadian period change or flowering time change resulting  
146 from misexpression of each oscillator component might be associated with certain changes  
147 in WUE. To test this, we related the data from our WUE screen to the circadian phase of  
148 expression of each mutated or overexpressed gene. We also compared the direction of  
149 change of WUE to the period and flowering time phenotypes that arise from each mutant or  
150 overexpressor (Fowler et al., 1999; Schultz et al., 2001; Doyle et al., 2002; Nakamichi et al.,  
151 2002; Yanovsky and Kay, 2002; Imaizumi et al., 2003; Más et al., 2003; Murakami et al.,  
152 2004; Farré et al., 2005; Hazen et al., 2005; Baena-González et al., 2007; Streitner et al.,  
153 2008; Wang et al., 2008; Baudry et al., 2010; Nakamichi et al., 2010; Rawat et al., 2011;  
154 Wahl et al., 2013; Hsu and Harmer, 2014). We note that the phenotypes reported by these  
155 studies were often identified under constant conditions, whereas our experiments occurred  
156 under light/dark cycles.

157 There was no obvious relationship between the circadian phenotypes that are caused by  
158 each mutant or overexpressor investigated and the WUE of each of these lines (Fig. 2B, C,  
159 D). For example, mutating morning-phased circadian oscillator components can either  
160 decrease or increase WUE (Fig. 2B). Mutants that cause long circadian periods and short  
161 circadian periods can both increase and decrease WUE (Fig. 2C). Furthermore, mutants and  
162 overexpressors that cause both early and delayed flowering can each increase and  
163 decrease WUE (Fig. 2D).

#### 164 *Circadian regulation of water use efficiency combines multiple traits*

165 Mutation or overexpression of components of the circadian oscillator can cause changes in  
166 the development of Arabidopsis, such as alterations in rosette size, leaf shape and petiole  
167 length (Fig. 3A) (Zagotta et al., 1992; Schaffer et al., 1998; Wang and Tobin, 1998; Dodd et  
168 al., 2005; Ruts et al., 2012; Rubin et al., 2018). These changes are likely to have  
169 implications for gas exchange because, for example, spatially separated leaves are  
170 predicted to transpire more water (Bridge et al., 2013). We investigated whether the changes  
171 in WUE that were identified by our screen might arise from differences in rosette architecture  
172 between the circadian clock-associated mutants and overexpressors and the wild types.  
173 There was a weak positive correlation between rosette leaf surface area and WUE ( $r =$   
174  $0.400$ ;  $r^2 = 0.160$ ;  $p < 0.001$ ) (Fig. 3B). Therefore, approximately 16% of variability in WUE  
175 can be explained by the variations in rosette leaf surface area that arise from misregulation  
176 of the circadian oscillator.

177 In comparison, rosette leaf surface area was strongly correlated with each of the individual  
178 parameters of water used and dry biomass accumulated. The variation in rosette surface  
179 area accounted for 83% of the variability in water transpired across the genotypes (Fig. 3C).  
180 Furthermore, the variation in rosette surface area accounted for 73% of the variability in  
181 biomass accumulation across the genotypes (Fig. 3D), which is unsurprising given that  
182 larger leaves are likely to contain more biomass. This demonstrates that one way that  
183 circadian regulation affects WUE is through the influence of the circadian oscillator upon

184 plant development and rosette architecture, but this variation in leaf area does not account  
185 for the majority of the influence of circadian regulation upon WUE. It also further supports  
186 the notion that the influence of the circadian oscillator upon WUE is complex, and cannot be  
187 explained by variation in one of water use or biomass accumulation alone.

188 *Circadian regulation within guard cells alone contributes to water use efficiency*

189 Next, we identified that the circadian oscillator within guard cells contributes to WUE. There  
190 is evidence that guard cells contain a circadian oscillator that regulates stomatal opening  
191 (Gorton et al., 1989; Hassidim et al., 2017). To investigate the contribution of the guard cell  
192 circadian oscillator to WUE, we overexpressed two circadian oscillator components (*CCA1*,  
193 *TOC1*) in guard cells, using two guard cell-specific promoters (*GC1*, *MYB60*) for each of  
194 *CCA1* and *TOC1* (Fig. 4A) (Cominelli et al., 2005; Galbiati et al., 2008; Yang et al., 2008;  
195 Nagy et al., 2009; Meyer et al., 2010; Cominelli et al., 2011; Bauer et al., 2013; Rusconi et  
196 al., 2013). *GC1* is a strong guard cell-specific promoter that is relatively unresponsive to a  
197 variety of environmental cues (cold, light, ABA, gibberellin) (Yang et al. 2008). We used the  
198 full-length *MYB60* promoter sequence, because truncated and chimeric versions of this  
199 promoter appear to have weaker activity and/or become rapidly downregulated by  
200 dehydration and ABA (Francia et al., 2008; Cominelli et al., 2011; Rusconi et al., 2013). This  
201 produced four sets of transgenic lines; *GC1::CCA1:nos* (*GC*), *GC1::TOC1:nos* (*GT*),  
202 *MYB60::CCA1:nos* (*MC*) and *MYB60::TOC1:nos* (*MT*). We termed these guard cell specific  
203 (GCS) plants. We confirmed the guard cell specificity of the *GC1* and *MYB60* promoters in  
204 our hands, by driving green fluorescent protein (GFP) under the control of these promoters.  
205 GFP accumulation was restricted to the guard cells (Fig. S2A, B). There was not a circadian  
206 oscillation in the activity of either the *GC1* or *MYB60* promoter under our experimental  
207 conditions (Fig. S2C), demonstrating that these promoters are appropriate for constitutive  
208 overexpression of circadian oscillator components within guard cells under our experimental  
209 conditions.



210 To further verify the guard cell-specific overexpression of *CCA1* and *TOC1* in the GCS  
211 plants, we examined *CCA1* and *TOC1* transcript accumulation within guard cells. Under  
212 constant light conditions, we measured *CCA1* transcript accumulation in epidermal peels at  
213 dusk (when *CCA1* transcript abundance is normally low in the wild type) and *TOC1*  
214 transcript accumulation at dawn (when *TOC1* transcript abundance is normally low in the  
215 wild type). Guard cell *CCA1* overexpressors had greater *CCA1* transcript abundance in  
216 epidermal peels at dusk than the wild type (*GC*:  $t_4 = -2.233$ ,  $p > 0.05$ ; *MC*:  $t_4 = -7.409$ ,  $p =$   
217  $0.002$ ) (Fig. S2D), and guard cell *TOC1* overexpressors had greater *TOC1* transcript  
218 abundance at dawn than the wild type (*GT*:  $t_4 = -6.636$ ,  $p = 0.003$ ; *MT*:  $t_4 = -2.736$ ,  $p =$   
219  $0.050$ ) (Fig. S2D). These data indicate that *CCA1* and *TOC1* were overexpressed within the  
220 guard cells of the guard cell-specific *CCA1* or *TOC1* overexpressor plants that we  
221 generated, respectively.

222 We investigated the effect on WUE of overexpression of *CCA1* and *TOC1* within guard cells.  
223 Two independent *GC1::CCA1* lines (*GC-1* and *GC-2*) were significantly more water use  
224 efficient than the wild type (*GC-1*:  $p < 0.001$ ; *GC-2*:  $p = 0.002$ ) (Fig. 4B). *GC-1* and *GC-2*  
225 were 8% and 4% more water use efficient than the wild type, respectively (Fig. 4B). Two  
226 independent *MYB60::CCA1* lines also had numerically higher WUE than the wild type, but  
227 this was not statistically significant ( $p > 0.05$ ) (Fig. 4B). In contrast, overexpression of *TOC1*  
228 in guard cells with both the *GC1* and *MYB60* promoters did not alter WUE ( $p > 0.05$ ) (Fig.  
229 4B). Together, these data suggest that overexpressing *CCA1* in guard cells can increase  
230 whole plant long-term WUE.

231 A previous study identified that constitutive overexpression of *TOC1* (*TOC1-ox*) reduces the  
232 dehydration tolerance of seedlings (Legnaioli et al., 2009). We wished to determine whether  
233 this altered dehydration tolerance is due specifically to the circadian oscillator within guard  
234 cells. Using a similar experimental system to Legnaioli et al. 2009, we found that  
235 *MYB60::CCA1* and *GC1::CCA1* increase dehydration survival (Fig. 4C). In contrast,  
236 *GC1::TOC1* and *MYB60::TOC1* had decreased dehydration survival relative to the wild type

237 (Fig. 4C). This suggests that overexpressing *CCA1* or *TOC1* in guard cells can increase or  
238 decrease survival to dehydration under constant light conditions, respectively.

239 Like *MYB60::CCA1* and *GC1::CCA1*, more seedlings constitutively overexpressing *CCA1*  
240 (*CCA1-ox*) survived dehydration under our experimental conditions (Fig. 4C). Similarly, like  
241 *GC1::TOC1* and *MYB60::TOC1*, more seedlings overexpressing *TOC1* constitutively (*TOC1-*  
242 *ox*) were killed by dehydration (Fig. 4C). Therefore, manipulation of the expression of these  
243 clock genes in guard cell and whole plants causes similar phenotypes, with some  
244 differences in magnitude (Fig. 4C). One interpretation is that altered dehydration survival in  
245 *CCA1-ox* and *TOC1-ox* seedlings might be partly or wholly due to the circadian clock that is  
246 specifically within guard cells. Because the stomatal density was unaltered relative to the  
247 wild type in the guard cell overexpressors of *CCA1* and *TOC1* (Fig. 4D, E), the WUE and  
248 dehydration survival phenotypes that we identified might be due to alterations in processes  
249 within guard cells rather than due to altered stomatal density.

## 250 **Discussion**

### 251 *Pervasive influence of the circadian oscillator upon water use efficiency*

252 Our data indicate that the circadian oscillator is important for regulating the long-term WUE  
253 of Arabidopsis. Misregulation of several functional subsections of the circadian oscillator  
254 altered the WUE of Arabidopsis. Misexpression of morning (*PRR7*, *PRR9*, *CCA1*), late day  
255 (*GI*, *PRR5*) and evening (*TOC1*, *ZTL*, *ELF3*) components of the circadian oscillator all  
256 perturb WUE under our experimental conditions (Fig. 1, Fig. 2B). Additionally, altered  
257 expression of *TEJ* and *GRP7* also alters WUE (Fig. 1). Therefore, oscillator components that  
258 impact WUE are not confined to a specific region or expression phase of the multi-loop  
259 circadian oscillator. Misexpression of genes encoding some proteins that provide  
260 environmental inputs to the circadian oscillator (*ELF3*, *TPS1*, *ZTL*, *KIN10*; (Covington et al.,  
261 2001; Kim et al., 2007; Shin et al., 2017; Frank et al., 2018)) also alters WUE. Together, this  
262 suggests that the entire circadian oscillator influences WUE, and that alterations in water  
263 use that are caused by mutations to the circadian oscillator are not confined to a specific

264 sub-loop of the circadian oscillator or restricted to its input or output pathways. One  
265 explanation for these circadian-system wide alterations in WUE relates to the nature of  
266 feedback within the circadian oscillator. The complex feedback and interconnectivity of the  
267 circadian oscillator means that individual components of the circadian oscillator that directly  
268 influence stomatal function or water use are likely to be altered by mutations that are distal  
269 to that component. Therefore, if correct circadian timing is required for optimum water use  
270 efficiency, multiple components of the circadian oscillator are likely to influence water use  
271 efficiency.

272 The sugar signalling proteins TPS1 and KIN10 influence a broad range of phenotypes, in  
273 addition to participating in circadian entrainment (Baena-González et al., 2007; Gómez et al.,  
274 2010; Paul et al., 2010; Delatte et al., 2011; Shin et al., 2017; Frank et al., 2018; Nietzsche  
275 et al., 2018; Simon et al., 2018). The *tps1-12* TILLING mutant of TPS1 decreases stomatal  
276 aperture and increases the ABA sensitivity of guard cells (Gómez et al., 2010), whereas we  
277 found that *tps1-11* and *tps1-12* had lower long-term WUE than the wild type (Fig. 1).  
278 Reduced biomass accumulation in *tps1-11* and *tps1-12* (Fig. 2A) was consistent with slow  
279 growth of these alleles (Gómez et al., 2010). Overall, this suggests that the decreased  
280 stomatal aperture of *tps1-12* mutants does not translate into an overall increase in WUE,  
281 potentially due to slower growth of the *tps1* mutants (Fig. 2A) (Gómez et al., 2010). The  
282 broad range of phenotypes that are altered in *tps1-11*, *tps1-12* and KIN10-ox 6.5 indicates  
283 that these genotypes might alter WUE through mechanisms other than circadian regulation.

#### 284 *Potential roles for the evening complex in WUE*

285 Our finding that ELF3 is important for WUE (Fig. 1) is supported by previous evidence.  
286 Under constant light conditions, wild type Arabidopsis has circadian rhythms of stomatal  
287 aperture, whereas *elf3* stomata are constantly open and unresponsive to light and dark  
288 (Kinoshita et al., 2011). Furthermore, ELF3 negatively regulates blue light-mediated stomatal  
289 opening (Kinoshita and Hayashi, 2011). Therefore, perturbation of the anticipation of

290 day/night transitions or responses to environmental cues in *elf3* stomata might cause long-  
291 term alterations in WUE.

292 ELF3 binds to the *PRR9* promoter and *elf3-1* has elevated *PRR9* transcript abundance  
293 (Thines and Harmon, 2010; Dixon et al., 2011; Herrero et al., 2012). The low WUE of *elf3-1*  
294 might potentially be caused by altered *PRR9* expression, because misregulation of *PRR9*  
295 also affected WUE (Fig. 1). In a similar fashion, ELF3/ELF4 signalling represses *PRR7*, and  
296 *elf3-1* has elevated *PRR7* transcript abundance (Herrero et al., 2012). Under light-dark  
297 cycles, *elf3-1* also has high and constitutive *GI* expression (Fowler et al., 1999), and *elf3-1*  
298 and *gi* mutants have opposite WUE phenotypes (Fig. 1). Therefore, the WUE phenotype of  
299 *elf3-1* (Fig. 1) might be caused by disruption of ELF3 itself, or alterations in *PRR7*, *PRR9*  
300 and/or *GI* expression.

301 Mutating further components of the evening complex (EC) (ELF4 and LUX) did not affect  
302 WUE (Fig. 1). This is despite the way that these genes influence circadian oscillator function  
303 and plant physiology (Hsu and Harmer, 2014; Huang and Nusinow, 2016), and nocturnal  
304 regulation of stomatal aperture impacts WUE (Costa et al., 2015; Coupel-Ledru et al., 2016).  
305 One possibility is that the impact of *elf3* on WUE may be greater than that of *elf4* or *lux*  
306 because ELF3 is key to EC scaffolding, with ELF3 operating genetically downstream from  
307 ELF4 and LUX (Herrero et al., 2012; Huang and Nusinow, 2016).

308 ELF4 appears to play a greater role in circadian regulation in the vascular tissue than  
309 stomatal guard cells, with vasculature expression up to ten times higher than other tissues  
310 (Endo et al., 2014). Because *elf3-1* affects WUE differently from *elf4-101* and *lux-1* (Fig. 1), it  
311 appears that ELF3 regulates WUE independently from ELF4 and LUX.

### 312 *Multiple physiological causes of altered WUE in circadian oscillator mutants*

313 Our data suggest that changes in WUE caused by misexpression of circadian clock  
314 components might be due to a combination of physiological factors. Some mutants or  
315 overexpressors tested alter biomass accumulation, whilst others predominantly alter water

316 loss (Fig. 2), so mutations to the circadian oscillator did not alter water use by specifically  
317 altering one of carbon assimilation or transpiration. This is consistent with previous work  
318 demonstrating that both stomatal opening and CO<sub>2</sub> fixation is perturbed in circadian  
319 arrhythmic plants under light/dark cycles (Dodd et al., 2005), and with the findings that daily  
320 carbohydrate management is dependent upon correct circadian regulation (Graf et al.,  
321 2010). We speculate that delayed or advanced stomatal and photosynthetic responses to  
322 the day-night cycle might occur in circadian period mutants, because period mutants  
323 inaccurately anticipate the onset of dawn (Dodd et al., 2014). Circadian clock mutants might  
324 also affect WUE by changing the sensitivity of stomatal movements and photosynthesis to  
325 environmental transitions, because there is circadian gating of the responses of both  
326 stomata and photosynthesis to environmental cues (Dodd et al., 2006; Kinoshita et al., 2011;  
327 Litthauer et al., 2015; Joo et al., 2017; Cano-Ramirez et al., 2018). Some effects of the  
328 circadian oscillator upon WUE arise from alterations in leaf size that occur in some circadian  
329 oscillator mutants (Fig. 3A, B). This suggests that developmental alterations arising from  
330 lesions in the circadian oscillator can lead to changes in WUE. Such developmental  
331 alterations might alter WUE by changing airflow around the rosette, boundary layer  
332 conductance, or internal leaf structure.

### 333 *Conclusions*

334 We show that circadian regulation contributes to whole plant long-term WUE under cycles of  
335 day and night. This control occurs partly through the influence of the circadian oscillator  
336 upon rosette architecture. Mutation or overexpression of CCA1, TOC1, ELF3, GI, GRP7,  
337 PRR5, PRR7, PRR9, TEJ and ZTL altered WUE under our experimental conditions. The  
338 roles of these genes in WUE may be independent or overlapping, and their WUE  
339 phenotypes might be due to direct effects of these genes, or indirect effects on transcript  
340 and/or protein abundance of other circadian clock gene(s). Misregulation of the expression  
341 of CHE, FKF1, LKP2, RVE4, RVE8, PRR3, ELF4, LUX and WNK1 did not appear to alter  
342 WUE under our experimental conditions.

343 Our results have a number of broad implications. Firstly, our data suggest that alterations in  
344 circadian function that arise during crop breeding could have the potential to increase or  
345 decrease WUE. Therefore, manipulation of the functioning of the circadian oscillator might  
346 represent a pathway to tune the WUE of crops. Second, our results indicate that circadian  
347 regulation in a single cell type can have implications for whole-plant physiology. Finally, our  
348 findings suggest that circadian regulation can alter a single trait (WUE) by affecting many  
349 aspects of physiology. In future, it would be informative to distinguish the contribution to  
350 overall WUE of circadian regulation within additional cell types, such as the mesophyll,  
351 vascular tissue, and root cell types.

352

## 353 **Materials and methods**

### 354 *Plant material and growth conditions*

355 *Arabidopsis* (*Arabidopsis thaliana* (L.) Heynh.) seeds were surface-sterilised as described  
356 previously (Noordally et al., 2013). For experiments investigating stomatal density and index,  
357 seeds were stratified for 3 days at 4 °C, then sown on compost mix comprising a 3:1 ratio of  
358 coarsely sieved Levington Advance F2 seed compost (Everris) and horticultural silver sand  
359 (Melcourt), supplemented with 0.4 g l<sup>-1</sup> thiacloprid insecticide granules (Exemptor; Everris).  
360 Plants were grown in controlled environment chambers (Reftech, Netherlands) under an 8 h  
361 photoperiod at 70% humidity, 20 °C, and photon flux density of 100 μmol m<sup>-2</sup> s<sup>-1</sup> of overhead  
362 lighting supplied by cool white fluorescent tubes (Reftech, Netherlands). For experiments  
363 investigating long-term WUE, seeds were sown within a custom Falcon tube system then  
364 stratified. Plants were cultivated in plant growth chambers (Snjider, Netherlands) under the  
365 experimental conditions described above. The genotypes that were screened for WUE  
366 alterations are identified in Table S1, and all have been described previously. For all  
367 experiments, at least two completely independent experimental repeats were performed per  
368 genotype and per treatment, with multiple replicate plants within each of the experimental  
369 repeats.

370 *Generation of transgenic lines*

371 To create the *GC1::CCA1:nos* (*GC*), *GC1::TOC1:nos* (*GT*), *MYB60::CCA1:nos* (*MC*) and  
372 *MYB60::TOC1:nos* (*MT*) constructs, the CaMV *nos* terminator sequence was ligated  
373 between the *SpeI* and *NotI* restriction sites in the pGREENII0229 binary vector (Hellens et  
374 al., 2000). The *GC1* upstream sequence (-1894 to -190) or *MYB60* upstream sequence (-  
375 1724 to -429) was then ligated between the *KpnI* and *Apal* restriction sites of  
376 pGREENII0229. Finally, the *CCA1* coding sequence or *TOC1* coding sequence, obtained  
377 using RT-PCR, was ligated between the restriction *XhoI* and *XmaI* sites. Primers used are  
378 identified in Table S2. Constructs were transformed into Col-0 wild type Arabidopsis using  
379 transformation with *Agrobacterium tumefaciens* strain GV3101. Transformants were  
380 identified by screening for phosphinothricin resistance, then further validated using genomic  
381 DNA PCR. Homozygous lines were identified via phosphinothricin (BASTA) resistance, and  
382 two independently transformed homozygous lines were investigated in detail per genotype.

383 Guard cell specificity of promoter activity was investigated using *GC1::GFP:nos* and  
384 *MYB60::GFP:nos* promoter-reporter lines (Sup. Fig. 3A-C), which were created as above  
385 with the *GFP* coding sequence ligated between the *XhoI* and *XmaI* restriction sites. Leaf  
386 discs (5 mm diameter) from seedlings or mature plants were mounted on microscope slides  
387 with dH<sub>2</sub>O, and examined for GFP fluorescence using confocal microscopy (Leica DMI6000).  
388 The following settings were used: argon laser at 20% capacity, 488 nm laser at 48%  
389 capacity with a bandwidth of 505 nm–515 nm, gain of 1250, offset at 0.2%, 20x or 40x  
390 objective, zoom x1 to x4.

391 *Measurement of water use efficiency*

392 The WUE assay was adapted from Wituszynska et al. (2013) (Wituszyńska et al., 2013).  
393 Plants were grown for 6 weeks in modified 50 ml Falcon tubes. The Falcon tube systems  
394 consisted of a 50 ml Falcon tube filled with 37.5 ml of a 1:1 ratio of compost: perlite and 35  
395 ml of Milli-Q water (Merck), with the remaining volume filled with a 1:1 ratio of compost: Milli-  
396 Q water (Fig. S3). Each Falcon tube lid had a 2 mm diameter hole drilled in its centre to



397 allow plant growth. The lid was spray-painted black (Hycote) because we found that the  
398 orange colour of the Falcon tube lid caused leaf curling (Fig. S3). The system was wrapped  
399 in aluminium foil to exclude light (Fig. S3). 10-15 seeds were sown through the Falcon tube  
400 lid using a pipette. Following stratification, Falcon tube systems were placed under growth  
401 conditions using a randomised experimental design. 7 days after germination, seedlings  
402 were trimmed to one per Falcon tube system, and initial Falcon tube weight was recorded.  
403 After 6 weeks of growth, rosette leaf surface area was measured by photography (D50;  
404 Nikon) and Fiji software, rosette dry weight was measured (4 d at 60°C), and final Falcon  
405 tube weight was recorded. Negative controls (Falcon tube systems without plants) were  
406 used to assess soil water evaporation over 18 experimental repeats, with an overall mean  
407 weight loss of 0.513 g ± 0.004 g over 6 weeks for plant-free Falcon tubes.

408 Plant WUE was calculated as follows:

$$WUE = \frac{d}{(t_i - t_f) - e}$$

409 Where  $d$  is the rosette dry weight at the end of the experiment (mg),  $t_i$  and  $t_f$  are the falcon  
410 tube weight at the start and end of the experiment, respectively (g), and  $e$  is the amount of  
411 water evaporation directly from the compost (g). WUE is derived as mg biomass per ml<sup>-1</sup>  
412 water lost. These calculations assumed that 1 g of weight change was equivalent to a  
413 change of 1 ml of water. For each of 3 independent experimental repeats, 15 plants were  
414 screened per genotype. Due to variation between the WUE of each background (Fig. S1),  
415 the WUE of each circadian oscillator genotype was normalized to its respective background  
416 and expressed as a percentage of that background. Statistical comparisons with the wild  
417 types were conducted before this normalization.

#### 418 *Dehydration tolerance assay*

419 This assay was adapted from Legnaioli et al. (2009). For experiments investigating survival  
420 to dehydration, surface-sterilized seeds were sown on Petri dishes containing half strength  
421 Murashige & Skoog basal salt mixture (0.5x MS) (Duchefa), supplemented with 0.8% (w/v)



422 agar and 3% (w/v) sucrose, then stratified for 3 days at 4 °C before transfer to the growth  
423 chamber. For these experiments, seedlings were cultivated in MLR-352 growth chambers  
424 (Panasonic) at 19°C with photon flux density of 120  $\mu\text{mol m}^{-2} \text{s}^{-1}$ . 14-day old seedlings were  
425 dehydrated on a double layer of filter paper (Fisher Scientific) for 9 h under constant light  
426 conditions, watered with sterile  $\text{dH}_2\text{O}$ , and kept under constant light conditions for a further  
427 48 h before being scored for survival. Seedlings with a green apical meristematic region  
428 were counted as survivors. 32 seedlings were treated per genotype and within each  
429 experimental repeat.

#### 430 *Measurement of stomatal density*

431 Plants were grown for 7-8 weeks on compost mix. Dental paste (Coltene) was applied to the  
432 abaxial surface of fully expanded leaves. Transparent nail varnish (Rimmel) was applied to  
433 these leaf moulds once they had set, and then peeled away from the mould using clear  
434 adhesive tape (Scotch Crystal). Stomatal and pavement cells were counted within an  
435 800  $\mu\text{m}$  x 800  $\mu\text{m}$  square at the centre of each leaf half, using an epifluorescence  
436 microscope (HAL100; Zeiss) and Volocity (Perkin Elmer) and Fiji software. For each  
437 experimental repeat, two leaves were sampled per plant and eight plants sampled per  
438 genotype. Stomatal index was calculated as follows:

$$SI = \frac{s}{s + p} * 100$$

439 Where *SI* is the stomatal index, *s* the number of stomata in the field of view (800  $\mu\text{m}$  x  
440 800  $\mu\text{m}$ ), and *p* the number of pavement cells in the field of view.

#### 441 *RNA extraction and qRT-PCR*

442 RNA extractions, cDNA synthesis, and qRT-PCR were performed according to (Simon et al.,  
443 2018), except approximately 10 seedlings were used per RNA sample and analysis was  
444 performed using an MXPro 3005 real time PCR system (Agilent) with 5x HOT FIREPol  
445 EvaGreen qPCR mastermix (Solis Biodyne). qRT-PCR primers are provided in Table S3.  
446 Rhythmic features within qPCR data were identified using the BioDare2 platform (Zielinski et

447 al., 2014), using the Fast Fourier Transform Non-Linear Least Squares method (FFT-NLLS).  
448 One independently-transformed line of each guard cell-specific circadian clock gene  
449 overexpressor was also investigated using qRT-PCR conducted on RNA isolated from  
450 epidermal peels. Abaxial leaf epidermis was detached, then washed in 10 mM MES (pH  
451 6.15, adjusted using 10 M KOH) to remove RNA derived from ruptured epidermal cells. Each  
452 RNA sample was derived from 20 epidermal peels (five plants, four leaves per plant) that  
453 were collated and flash-frozen in liquid nitrogen. Guard cell RNA was extracted using the  
454 RNeasy UCP Micro Kit (Qiagen) according to manufacturer's instructions, with the following  
455 modification: guard cell lysis was performed by adding glass beads (425  $\mu$ m - 600  $\mu$ m  
456 diameter, acid washed, from Sigma-Aldrich) and 350  $\mu$ l RULT buffer to the sample, then  
457 vortexed for 5 min.

#### 458 *Accession numbers*

459 Arabidopsis Genome Initiative identifiers for the genes mentioned in this study are: *CCA1*  
460 (*CIRCADIAN CLOCK ASSOCIATED1*, At2g46830), *CHE* (*CCA1 HIKING EXPEDITION*,  
461 At5g08330), *ELF3* (*EARLY FLOWERING3*, At2g25930), *ELF4* (*EARLY FLOWERING4*,  
462 At2g40080), *FKF1* (*F BOX1*, At1g68050), *GI* (*GIGANTEA*, At1g22770), *GRP7* (*GLYCINE*  
463 *RICH PROTEIN7*, At2g21660), *KIN10* (*SNF1-RELATED PROTEIN KINASE1.1*, At3g01090),  
464 *LKP2* (*LOV KELCH PROTEIN2*, At2g18915), *LUX* (*LUX ARRHYTHMO*, At3g46640),  
465 *MYB60* (*MYB DOMAIN PROTEIN60*, At1g08810), *PRR3* (*PSEUDO-RESPONSE*  
466 *REGULATOR3*, At5g60100), *PRR5* (*PSEUDO-RESPONSE REGULATOR5*, At5g24470),  
467 *PRR7* (*PSEUDO-RESPONSE REGULATOR7*, At5g02810), *PRR9* (*PSEUDO-RESPONSE*  
468 *REGULATOR9*, At2g46790), *RVE4* (*REVEILLE4*, At5g02840), *TEJ* (*POLY(ADP-*  
469 *RIBOSE)GLYCOHYDROLASE1*, At2g31870), *TIC* (*TIME FOR COFFEE*, At3gt22380),  
470 *TOC1* (*TIMING OF CAB EXPRESSION1*, At5g61380), *TPS1* (*TREHALOSE-6-PHOSPHATE*  
471 *SYNTHASE1*, At1g78580), *WNK1* (*WITH NO LYSINE KINASE1*, At3g04910), *ZTL*  
472 (*ZEITLUPE*, At5g57360).

473 **Acknowledgements**

474 We thank Kester Cragg-Barber, James Chen, Ioanna Kostaki, Jean-Charles Isner, Deirdre  
475 McLachlan, Peng Sun, Ashutosh Sharma and Dora Cano-Ramirez for technical advice  
476 during experimentation. We thank Marc Knight and Tracy Lawson for helpful discussions  
477 concerning data interpretation. We are grateful to Keara Franklin, Alex Webb, Paloma Mas,  
478 Steve Kay, Isabelle Carre, Takato Imaizumi, Filip Rolland, Ian Graham, Stacey Harmer, and  
479 Steven Penfield for donating seed lines for this study. This research was funded the UK  
480 Biotechnology and Biological Sciences Research Council (BBSRC; grant BB/J014400/1)  
481 and the Wolfson Foundation.

482

483

484 **Figure legends**

485 **Figure 1.** The circadian clock regulates long-term water use efficiency of Arabidopsis under  
486 light/dark cycles. The WUE of circadian clock mutants and overexpressors is expressed as a  
487 percentage of their respective background (normalized to 100%, red reference line) to  
488 account for WUE variation between background accessions ( $n = 5 - 15$ ). Data were analysed  
489 using independent-samples t-tests and statistical significance is indicated relative to the  
490 background using (\* =  $p < 0.05$ ; \*\* =  $p < 0.01$ ; \*\*\* =  $p < 0.001$ ). Statistical analysis was  
491 performed on raw data, with data subsequently converted to a percentage of the wild type  
492 for the purposes of comparison and presentation. Screens were repeated independently  
493 three times per genotype, with one representative experimental repeat shown here for each  
494 genotype.

495 **Figure 2.** Altered WUE of plants with mutations or overexpression of circadian clock  
496 associated genes is not caused consistently by variation in one of dry weight, water use,  
497 phase of expression of each gene, or resultant altered period or flowering time. Data are  
498 derived from Fig. 1 and expressed as a percentage of the respective background (WT,  
499 normalised to 100%, red reference line) ( $n = 5 - 15$ ). (A) Altered WUE is not specifically due  
500 to altered water use or altered dry weight of screened genotypes, but results from the  
501 combination of both. (b-d) Variations in WUE are not explained by (B) phase expression of  
502 mutated/overexpressed gene, nor by altered (C) period or (D) flowering time of the  
503 mutated/overexpressor genotype. Genotypes reported to have no change (N/C) in period or  
504 flowering time relative to the wild type are included on the left of panels (B) and (C), while  
505 those for which period and/or flowering time are unknown are included on the right. Studies  
506 describing the phase of expression, period and flowering time of the genotypes tested are  
507 identified in the main text. We note that the phase of expression and period data used for  
508 this analysis were often obtained under constant conditions, in contrast to our experiments  
509 occurring under light/dark cycles.

510 **Figure 3.** The circadian oscillator alters WUE partially by changing rosette architecture. (A)  
511 Altering circadian-associated gene expression can affect rosette architecture and size, as  
512 illustrated for *elf3-1*, *lux-1*, and *gi-2* in (Col-0 background). Image backgrounds removed for  
513 clarity. Variation in rosette leaf surface area across the genotypes investigated explained (B)  
514 16% of variation in WUE ( $p < 0.001$ ,  $r = 0.400$ ,  $r^2 = 0.160$ ), (C) 83% of variation in  
515 transpiration ( $p < 0.001$ ,  $r = 0.912$ ,  $r^2 = 0.832$ ) and (D) 73% of variation in rosette dry  
516 biomass ( $p < 0.001$ ,  $r = 0.857$ ,  $r^2 = 0.734$ ). Data were analysed using Pearson correlation  
517 tests.

518 **Figure 4.** Overexpressing *CCA1* or *TOC1* in guard cells affects WUE and survival of  
519 dehydration by seedlings. (A) Constructs used to overexpress *CCA1* or *TOC1* coding  
520 sequence under control of *GC1* or *MYB60* promoters. (B) Guard cell *CCA1* overexpression  
521 can increase WUE. WUE expressed as a percentage of the wild type (normalised to 100%,  
522 red reference line). Two to four independent experimental repeats were performed, with data  
523 from one representative dataset shown ( $n = 5 - 15$ ). Data for *CCA1*-ox and *TOC1*-ox are  
524 derived from Fig. 1, for purposes of comparison. Data were analysed with independent  
525 samples t-tests, and statistical significance compared to Col-0 is indicated using starring (\*\*  
526 =  $p < 0.01$ ; \*\*\* =  $p < 0.001$ ). (C) Guard cell *CCA1* or *TOC1* overexpression alters  
527 dehydration survival of seedlings compared with the wild type. Data were obtained from  
528 three independent experimental repeats (mean;  $n = 32$  per experimental replicate; at least  
529 two independent experimental repeats were performed for each genotype). A single  
530 *GC1::TOC1* line is shown here because other lines produced extremely variable data. (D,E)  
531 Guard cell *CCA1* or *TOC1* overexpression does not affect (D) stomatal index nor (E)  
532 stomatal density. Two independent experimental repeats were performed, with data from  
533 one representative dataset shown ( $n = 19 - 32$ ; mean  $\pm$  S.E.M.). Data were analysed with  
534 ANOVA and Tukey's post hoc tests (NS =  $p > 0.05$ ). Bar colours identify the whole plant  
535 overexpressor control (black), wild type control (dark grey), and guard cell-specific  
536 overexpressor genotypes (light grey).

537 **References**

- 538 **Baena-González E, Rolland F, Thevelein JM, Sheen J** (2007) A central integrator of  
539 transcription networks in plant stress and energy signalling. *Nature* **448**: 938
- 540 **Baudry A, Ito S, Song YH, Strait AA, Kiba T, Lu S, Henriques R, Pruneda-Paz JL, Chua**  
541 **N-H, Tobin EM, Kay SA, Imaizumi T** (2010) F-Box proteins FKF1 and LKP2 act in  
542 concert with ZEITLUPE to control Arabidopsis clock progression. *The Plant Cell* **22**:  
543 606
- 544 **Bauer H, Ache P, Lautner S, Fromm J, Hartung W, Al-Rasheid Khaled AS, Sonnewald**  
545 **S, Sonnewald U, Kneitz S, Lachmann N, Mendel Ralf R, Bittner F, Hetherington**  
546 **Alistair M, Hedrich R** (2013) The stomatal response to reduced relative humidity  
547 requires guard cell-autonomous ABA synthesis. *Current Biology* **23**: 53-57
- 548 **Blum A** (2009) Effective use of water (EUW) and not water-use efficiency (WUE) is the  
549 target of crop yield improvement under drought stress. *Field Crops Research* **112**:  
550 119-123
- 551 **Bridge LJ, Franklin KA, Homer ME** (2013) Impact of plant shoot architecture on leaf  
552 cooling: a coupled heat and mass transfer model. *Journal of The Royal Society*  
553 *Interface* **10**: 20130326
- 554 **Caine RS, Yin X, Sloan J, Harrison EL, Mohammed U, Fulton T, Biswal AK, Dionora J,**  
555 **Chater CC, Coe RA, Bandyopadhyay A, Murchie EH, Swarup R, Quick WP, Gray**  
556 **JE** (2019) Rice with reduced stomatal density conserves water and has improved  
557 drought tolerance under future climate conditions. *New Phytologist* **221**: 371-384
- 558 **Cano-Ramirez DL, Saskia de Fraine T, Griffiths OG, Dodd AN** (2018) Photosynthesis and  
559 circadian rhythms regulate the buoyancy of marimo lake balls. *Current Biology* **28**:  
560 R869-R870
- 561 **Cominelli E, Galbiati M, Albertini A, Fornara F, Conti L, Coupland G, Tonelli C** (2011)  
562 DOF-binding sites additively contribute to guard cell-specificity of *AtMYB60* promoter.  
563 *BMC Plant Biology* **11**: article 162
- 564 **Cominelli E, Galbiati M, Vavasseur A, Conti L, Sala T, Vuylsteke M, Leonhardt N,**  
565 **Dellaporta SL, Tonelli C** (2005) A guard-cell-specific MYB transcription factor  
566 regulates stomatal movements and plant drought tolerance. *Current Biology* **15**:  
567 1196-1200
- 568 **Condon AG, Farquhar GD, Rebetzke GJ, Richards RA** (2004) Breeding for high water-  
569 use efficiency. *Journal of Experimental Botany* **55**: 2447-2460
- 570 **Costa JM, Monnet F, Jannaud D, Leonhardt N, Ksas B, Reiter IM, Pantin F, Genty B**  
571 **(2015) OPEN ALL NIGHT LONG: The dark side of stomatal control. Plant Physiology**  
572 **167**: 289
- 573 **Coupel-Ledru A, Lebon E, Christophe A, Gallo A, Gago P, Pantin F, Doligez A,**  
574 **Simonneau T** (2016) Reduced nighttime transpiration is a relevant breeding target  
575 for high water-use efficiency in grapevine. *Proceedings of the National Academy of*  
576 *Sciences* **113**: 8963
- 577 **Covington MF, Panda S, Liu XL, Strayer CA, Wagner DR, Kay SA** (2001) ELF3  
578 modulates resetting of the circadian clock in Arabidopsis. *The Plant Cell* **13**: 1305
- 579 **Delatte TL, Sedijani P, Kondou Y, Matsui M, de Jong GJ, Somsen GW, Wiese-**  
580 **Klinkenberg A, Primavesi LF, Paul MJ, Schlupepmann H** (2011) Growth arrest by  
581 trehalose-6-phosphate: An astonishing case of primary metabolite control over  
582 growth by way of the SnRK1 signaling pathway. *Plant Physiology* **157**: 160
- 583 **Ding Z, Millar AJ, Davis AM, Davis SJ** (2007) *TIME FOR COFFEE* encodes a nuclear  
584 regulator in the *Arabidopsis thaliana* circadian clock. *The Plant Cell* **19**: 1522
- 585 **Dixon LE, Knox K, Kozma-Bognar L, Southern MM, Pokhilko A, Millar AJ** (2011)  
586 Temporal repression of core circadian genes is mediated through EARLY  
587 FLOWERING 3 in Arabidopsis. *Current Biology* **21**: 120-125
- 588 **Dodd AN, Dalchau N, Gardner MJ, Baek S-J, Webb AAR** (2014) The circadian clock has  
589 transient plasticity of period and is required for timing of nocturnal processes in  
590 Arabidopsis. *New Phytologist* **201**: 168-179



- 591 **Dodd AN, Jakobsen MK, Baker AJ, Telzerow A, Hou S-W, Laplaze L, Barrot L, Scott**  
592 **Poethig R, Haseloff J, Webb AAR** (2006) Time of day modulates low-temperature  
593  $Ca^{2+}$  signals in Arabidopsis. *The Plant Journal* **48**: 962-973
- 594 **Dodd AN, Parkinson K, Webb AAR** (2004) Independent circadian regulation of assimilation  
595 and stomatal conductance in the *ztl-1* mutant of Arabidopsis. *New Phytologist* **162**:  
596 63-70
- 597 **Dodd AN, Salathia N, Hall A, Kévei E, Tóth R, Nagy F, Hibberd JM, Millar AJ, Webb**  
598 **AAR** (2005) Plant circadian clocks increase photosynthesis, growth, survival, and  
599 competitive advantage. *Science* **309**: 630
- 600 **Doyle MR, Davis SJ, Bastow RM, McWatters HG, Kozma-Bognár L, Nagy F, Millar AJ,**  
601 **Amasino RM** (2002) The ELF4 gene controls circadian rhythms and flowering time  
602 in *Arabidopsis thaliana*. *Nature* **419**: 74
- 603 **Edwards CE, Ewers BE, McClung CR, Lou P, Weinig C** (2012) Quantitative variation in  
604 water-use efficiency across water regimes and its relationship with circadian,  
605 vegetative, reproductive, and leaf gas-exchange traits. *Molecular Plant* **5**: 653-668
- 606 **Edwards CE, Weinig C** (2010) The quantitative-genetic and QTL architecture of trait  
607 integration and modularity in *Brassica rapa* across simulated seasonal settings.  
608 *Heredity* **106**: 661
- 609 **Endo M, Shimizu H, Nohales MA, Araki T, Kay SA** (2014) Tissue-specific clocks in  
610 Arabidopsis show asymmetric coupling. *Nature* **515**: 419
- 611 **Eriksson ME, Hanano S, Southern MM, Hall A, Millar AJ** (2003) Response regulator  
612 homologues have complementary, light-dependent functions in the Arabidopsis  
613 circadian clock. *Planta* **218**: 159-162
- 614 **Farré EM, Harmer SL, Harmon FG, Yanovsky MJ, Kay SA** (2005) Overlapping and  
615 distinct roles of PRR7 and PRR9 in the Arabidopsis circadian clock. *Current Biology*  
616 **15**: 47-54
- 617 **Ferguson JN, Humphry M, Lawson T, Brendel O, Bechtold U** (2018) Natural variation of  
618 life-history traits, water use, and drought responses in Arabidopsis. *Plant Direct* **2**:  
619 e00035
- 620 **Fowler S, Lee K, Onouchi H, Samach A, Richardson K, Morris B, Coupland G, Putterill**  
621 **J** (1999) *GIGANTEA*: a circadian clock- controlled gene that regulates photoperiodic  
622 flowering in Arabidopsis and encodes a protein with several possible membrane-  
623 spanning domains. *The EMBO Journal* **18**: 4679
- 624 **Francia P, Simoni L, Cominelli E, Tonelli C, Galbiati M** (2008) Gene trap-based  
625 identification of a guard cell promoter in Arabidopsis. *Plant Signaling & Behavior* **3**:  
626 684-686
- 627 **Frank A, Mantioli CC, Viana AJC, Hearn TJ, Kusakina J, Belbin FE, Wells Newman D,**  
628 **Yochikawa A, Cano-Ramirez DL, Chembath A, Cragg-Barber K, Haydon MJ,**  
629 **Hotta CT, Vincentz M, Webb AAR, Dodd AN** (2018) Circadian entrainment in  
630 Arabidopsis by the sugar-responsive transcription factor bZIP63. *Current Biology* **28**:  
631 2597-2606.e2596
- 632 **Franks PJ, W. Doheny-Adams T, Britton-Harper ZJ, Gray JE** (2015) Increasing water-use  
633 efficiency directly through genetic manipulation of stomatal density. *New Phytologist*  
634 **207**: 188-195
- 635 **Galbiati M, Simoni L, Pavesi G, Cominelli E, Francia P, Vavasseur A, Nelson T, Bevan**  
636 **M, Tonelli C** (2008) Gene trap lines identify Arabidopsis genes expressed in  
637 stomatal guard cells. *The Plant Journal* **53**: 750-762
- 638 **Gómez LD, Gilday A, Feil R, Lunn JE, Graham IA** (2010) AtTPS1-mediated trehalose 6-  
639 phosphate synthesis is essential for embryogenic and vegetative growth and  
640 responsiveness to ABA in germinating seeds and stomatal guard cells. *The Plant*  
641 *Journal* **64**: 1-13
- 642 **Gorton HL, Williams WE, Binns ME, Gemmell CN, Leheny EA, Shepherd AC** (1989)  
643 Circadian stomatal rhythms in epidermal peels from *Vicia faba*. *Plant Physiology* **90**:  
644 1329

- 645 **Graf A, Schlereth A, Stitt M, Smith AM** (2010) Circadian control of carbohydrate  
646 availability for growth in *Arabidopsis* plants at night. *Proceedings of the National*  
647 *Academy of Sciences* **107**: 9458
- 648 **Hall A, Bastow RM, Davis SJ, Hanano S, McWatters HG, Hibberd V, Doyle MR, Sung S,**  
649 **Halliday KJ, Amasino RM, Millar AJ** (2003) The *TIME FOR COFFEE* gene  
650 maintains the amplitude and timing of *Arabidopsis* circadian clocks. *The Plant Cell*  
651 **15**: 2719
- 652 **Harmer SL, Hogenesch JB, Straume M, Chang H-S, Han B, Zhu T, Wang X, Kreps JA,**  
653 **Kay SA** (2000) Orchestrated transcription of key pathways in *Arabidopsis* by the  
654 circadian clock. *Science* **290**: 2110
- 655 **Hassidim M, Dakhiya Y, Turjeman A, Hussien D, Shor E, Anidjar A, Goldberg K, Green**  
656 **RM** (2017) *CIRCADIAN CLOCK ASSOCIATED1 (CCA1)* and the circadian control of  
657 stomatal aperture. *Plant Physiology* **175**: 1864
- 658 **Haydon MJ, Mielczarek O, Robertson FC, Hubbard KE, Webb AAR** (2013)  
659 Photosynthetic entrainment of the *Arabidopsis thaliana* circadian clock. *Nature* **502**:  
660 689
- 661 **Hazen SP, Schultz TF, Pruneda-Paz JL, Borevitz JO, Ecker JR, Kay SA** (2005) *LUX*  
662 *ARRHYTHMO* encodes a Myb domain protein essential for circadian rhythms.  
663 *Proceedings of the National Academy of Sciences of the United States of America*  
664 **102**: 10387
- 665 **Hellens RP, Edwards EA, Leyland NR, Bean S, Mullineaux PM** (2000) pGreen: a  
666 versatile and flexible binary Ti vector for *Agrobacterium*-mediated plant  
667 transformation. *Plant Molecular Biology* **42**: 819-832
- 668 **Hennessey TL, Field CB** (1991) Circadian rhythms in photosynthesis. *Plant Physiology* **96**:  
669 831
- 670 **Herrero E, Kolmos E, Bujdoso N, Yuan Y, Wang M, Berns MC, Uhlworm H, Coupland**  
671 **G, Saini R, Jaskolski M, Webb A, Gonçalves J, Davis SJ** (2012) EARLY  
672 FLOWERING4 recruitment of EARLY FLOWERING3 in the nucleus sustains the  
673 *Arabidopsis* circadian clock. *The Plant Cell* **24**: 428
- 674 **Hetherington AM, Woodward FI** (2003) The role of stomata in sensing and driving  
675 environmental change. *Nature* **424**: 901
- 676 **Hsu PY, Harmer SL** (2014) Wheels within wheels: the plant circadian system. *Trends in*  
677 *Plant Science* **19**: 240-249
- 678 **Hu H, Xiong L** (2014) Genetic engineering and breeding of drought-resistant crops. *Annual*  
679 *Review of Plant Biology* **65**: 715-741
- 680 **Huang H, Nusinow DA** (2016) Into the evening: Complex interactions in the *Arabidopsis*  
681 circadian clock. *Trends in Genetics* **32**: 674-686
- 682 **Hugouvieux V, Kwak JM, Schroeder JI** (2001) An mRNA cap binding protein, ABH1,  
683 modulates early abscisic acid signal transduction in *Arabidopsis*. *Cell* **106**: 477-487
- 684 **Imaizumi T, Schultz TF, Harmon FG, Ho LA, Kay SA** (2005) FKF1 F-Box protein mediates  
685 cyclic degradation of a repressor of *CONSTANS* in *Arabidopsis*. *Science* **309**: 293
- 686 **Imaizumi T, Tran HG, Swartz TE, Briggs WR, Kay SA** (2003) FKF1 is essential for  
687 photoperiodic-specific light signalling in *Arabidopsis*. *Nature* **426**: 302
- 688 **Joo Y, Fragoso V, Yon F, Baldwin IT, Kim S-G** (2017) Circadian clock component, LHY,  
689 tells a plant when to respond photosynthetically to light in nature. *Journal of*  
690 *Integrative Plant Biology* **59**: 572-587
- 691 **Karaba A, Dixit S, Greco R, Aharoni A, Trijatmiko KR, Marsch-Martinez N, Krishnan A,**  
692 **Nataraja KN, Udayakumar M, Pereira A** (2007) Improvement of water use  
693 efficiency in rice by expression of *HARDY*, an *Arabidopsis* drought and salt tolerance  
694 gene. *Proceedings of the National Academy of Sciences* **104**: 15270
- 695 **Khanna R, Kikis EA, Quail PH** (2003) *EARLY FLOWERING 4* functions in Phytochrome B-  
696 regulated seedling de-etiolation. *Plant Physiology* **133**: 1530
- 697 **Kikis EA, Khanna R, Quail PH** (2005) ELF4 is a phytochrome-regulated component of a  
698 negative-feedback loop involving the central oscillator components CCA1 and LHY.  
699 *The Plant Journal* **44**: 300-313



- 700 **Kim W-Y, Fujiwara S, Suh S-S, Kim J, Kim Y, Han L, David K, Putterill J, Nam HG,**  
701 **Somers DE** (2007) ZEITLUPE is a circadian photoreceptor stabilized by GIGANTEA  
702 in blue light. *Nature* **449**: 356
- 703 **Kinoshita T, Hayashi Y** (2011) New insights into the regulation of stomatal opening by blue  
704 light and plasma membrane H<sup>+</sup>-ATPase. In KW Jeon, ed, *International Review of Cell*  
705 *and Molecular Biology*, Vol 289. Academic Press, pp 89-115
- 706 **Kinoshita T, Ono N, Hayashi Y, Morimoto S, Nakamura S, Soda M, Kato Y, Ohnishi M,**  
707 **Nakano T, Inoue S-i, Shimazaki K-i** (2011) FLOWERING LOCUS T regulates  
708 stomatal opening. *Current Biology* **21**: 1232-1238
- 709 **Lawson T, Blatt MR** (2014) Stomatal size, speed, and responsiveness impact on  
710 photosynthesis and water use efficiency. *Plant Physiology* **164**: 1556
- 711 **Legnaioli T, Cuevas J, Mas P** (2009) TOC1 functions as a molecular switch connecting the  
712 circadian clock with plant responses to drought. *The EMBO Journal* **28**: 3745
- 713 **Litthauer S, Battle MW, Lawson T, Jones MA** (2015) Phototropins maintain robust  
714 circadian oscillation of PSII operating efficiency under blue light. *The Plant Journal*  
715 **83**: 1034-1045
- 716 **Más P, Kim W-Y, Somers DE, Kay SA** (2003) Targeted degradation of TOC1 by ZTL  
717 modulates circadian function in *Arabidopsis thaliana*. *Nature* **426**: 567
- 718 **Masle J, Gilmore SR, Farquhar GD** (2005) The *ERECTA* gene regulates plant transpiration  
719 efficiency in *Arabidopsis*. *Nature* **436**: 866
- 720 **Medrano H, Tomás M, Martorell S, Flexas J, Hernández E, Rosselló J, Pou A, Escalona**  
721 **J-M, Bota J** (2015) From leaf to whole-plant water use efficiency (WUE) in complex  
722 canopies: Limitations of leaf WUE as a selection target. *The Crop Journal* **3**: 220-228
- 723 **Meyer S, Mumm P, Imes D, Endler A, Weder B, Al-Rasheid KAS, Geiger D, Marten I,**  
724 **Martinoia E, Hedrich R** (2010) AtALMT12 represents an R-type anion channel  
725 required for stomatal movement in *Arabidopsis* guard cells. *The Plant Journal* **63**:  
726 1054-1062
- 727 **Michael TP, Salomé PA, Yu HJ, Spencer TR, Sharp EL, McPeck MA, Alonso JM, Ecker**  
728 **JR, McClung CR** (2003) Enhanced fitness conferred by naturally occurring variation  
729 in the circadian clock. *Science* **302**: 1049
- 730 **Millar AJ** (2004) Input signals to the plant circadian clock. *Journal of Experimental Botany*  
731 **55**: 277-283
- 732 **Millar AJ, Carre IA, Strayer CA, Chua NH, Kay SA** (1995) Circadian clock mutants in  
733 *Arabidopsis* identified by luciferase imaging. *Science* **267**: 1161
- 734 **Murakami M, Yamashino T, Mizuno T** (2004) Characterization of circadian-associated  
735 APRR3 pseudo-response regulator belonging to the APRR1/TOC1 quintet in  
736 *Arabidopsis thaliana*. *Plant and Cell Physiology* **45**: 645-650
- 737 **Na J-K, Metzger JD** (2014) Chimeric promoter mediates guard cell-specific gene expression  
738 in tobacco under water deficit. *Biotechnology Letters* **36**: 1893-1899
- 739 **Nagy R, Grob H, Weder B, Green P, Klein M, Frelet A, Schjoerring JK, Brearley CA,**  
740 **Martinoia E** (2009) The *Arabidopsis* ATP-binding cassette protein  
741 ATMRP5/ATABCC5 is a high-affinity inositol hexakisphosphate transporter involved  
742 in guard cell signaling and phytate storage. *Journal of Biological Chemistry*  
743 **Nakamichi N, Kiba T, Henriques R, Mizuno T, Chua N-H, Sakakibara H** (2010) PSEUDO-  
744 RESPONSE REGULATORS 9, 7, and 5 are transcriptional repressors in *Arabidopsis*  
745 circadian clock. *The Plant Cell* **22**: 594
- 746 **Nakamichi N, Murakami-Kojima M, Sato E, Kishi Y, Yamashino T, Mizuno T** (2002)  
747 Compilation and characterization of a novel WNK family of protein kinases in  
748 *Arabidopsis thaliana* with reference to circadian rhythms. *Bioscience, Biotechnology,*  
749 *and Biochemistry* **66**: 2429-2436
- 750 **Nienhuis J, Sills GR, Martin B, King G** (1994) Variance for water-use efficiency among  
751 ecotypes and recombinant inbred lines of *Arabidopsis thaliana* (Brassicaceae).  
752 *American Journal of Botany* **81**: 943-947

- 753 **Nietzsche M, Guerra T, Alseekh S, Wiermer M, Sonnewald S, Fernie AR, Börnke F**  
754 (2018) STOREKEEPER RELATED1/G-element binding protein (STKR1) interacts  
755 with protein kinase SnRK1. *Plant Physiology* **176**: 1773
- 756 **Noordally ZB, Ishii K, Atkins KA, Wetherill SJ, Kusakina J, Walton EJ, Kato M, Azuma**  
757 **M, Tanaka K, Hanaoka M, Dodd AN** (2013) Circadian control of chloroplast  
758 transcription by a nuclear-encoded timing signal. *Science* **339**: 1316
- 759 **Panda S, Poirier GG, Kay SA** (2002) *tej* defines a role for poly(ADP-ribosylation) in  
760 establishing period length of the *Arabidopsis* circadian oscillator. *Developmental Cell*  
761 **3**: 51-61
- 762 **Paul MJ, Jhurreea D, Zhang Y, Primavesi LF, Delatte T, Schluempmann H, Wingler A**  
763 (2010) Up-regulation of biosynthetic processes associated with growth by trehalose  
764 6-phosphate. *Plant Signaling & Behavior* **5**: 386-392
- 765 **Pei Z-M, Ghassemian M, Kwak CM, McCourt P, Schroeder JI** (1998) Role of  
766 farnesyltransferase in ABA regulation of guard cell anion channels and plant water  
767 loss. *Science* **282**: 287
- 768 **Pruneda-Paz JL, Breton G, Para A, Kay SA** (2009) A functional genomics approach  
769 reveals CHE as a component of the *Arabidopsis* circadian clock. *Science* **323**: 1481
- 770 **Rawat R, Takahashi N, Hsu PY, Jones MA, Schwartz J, Salemi MR, Phinney BS,**  
771 **Harmer SL** (2011) REVEILLE8 and PSEUDO-RESPONSE REGULATOR5 form a  
772 negative feedback loop within the *Arabidopsis* circadian clock. *PLOS Genetics* **7**:  
773 e1001350
- 774 **Resco de Dios V, Gessler A, Pedro Ferrio J, Alday JG, Bahn M, del Castillo J, Devidal**  
775 **S, García-Muñoz S, Kayler Z, Landais D, Martín-Gómez P, Milcu A, Piel C,**  
776 **Pirhofer-Walzl K, Ravel O, Salekin S, Tissue DT, Tjoelker MG, Voltas J, Roy J**  
777 (2016) Circadian rhythms have significant effects on leaf-to-canopy scale gas  
778 exchange under field conditions. *GigaScience* **5**
- 779 **Rubin MJ, Brock MT, Baker RL, Wilcox S, Anderson K, Davis SJ, Weinig C** (2018)  
780 Circadian rhythms are associated with shoot architecture in natural settings. *New*  
781 *Phytologist* **219**: 246-258
- 782 **Ruggiero A, Punzo P, Landi S, Costa A, Van Oosten JM, Grillo S** (2017) Improving plant  
783 water use efficiency through molecular genetics. *Horticulturae* **3**
- 784 **Rusconi F, Simoni L, Simeoni F, Tonelli C, Galbiati M, Cominelli E, Conti L, Riboni M,**  
785 **Francia P, Martin CR** (2013) The *Arabidopsis thaliana* MYB60 promoter provides a  
786 tool for the spatio-temporal control of gene expression in stomatal guard cells.  
787 *Journal of Experimental Botany* **64**: 3361-3371
- 788 **Ruts T, Matsubara S, Wiese-Klinkenberg A, Walter A** (2012) Aberrant temporal growth  
789 pattern and morphology of root and shoot caused by a defective circadian clock in  
790 *Arabidopsis thaliana*. *The Plant Journal* **72**: 154-161
- 791 **Salomé PA, McClung CR** (2005) *PSEUDO-RESPONSE REGULATOR 7* and *9* are partially  
792 redundant genes essential for the temperature responsiveness of the *Arabidopsis*  
793 circadian clock. *The Plant Cell* **17**: 791
- 794 **Schaffer R, Ramsay N, Samach A, Corden S, Putterill J, Carré IA, Coupland G** (1998)  
795 The *late elongated hypocotyl* mutation of *Arabidopsis* disrupts circadian rhythms and  
796 the photoperiodic control of flowering. *Cell* **93**: 1219-1229
- 797 **Schroeder JI, Allen GJ, Hugouvieux V, Kwak JM, Waner D** (2001) Guard cell signal  
798 transduction. *Annual Review of Plant Physiology and Plant Molecular Biology* **52**:  
799 627-658
- 800 **Schultz TF, Kiyosue T, Yanovsky M, Wada M, Kay SA** (2001) A Role for LKP2 in the  
801 Circadian Clock of *Arabidopsis*. *The Plant Cell* **13**: 2659
- 802 **Shin J, Sánchez-Villarreal A, Davis AM, Du S-x, Berendzen KW, Koncz C, Ding Z, Li C,**  
803 **Davis SJ** (2017) The metabolic sensor AKIN10 modulates the *Arabidopsis* circadian  
804 clock in a light-dependent manner. *Plant, Cell & Environment* **40**: 997-1008
- 805 **Simon NML, Kusakina J, Fernández-López Á, Chembath A, Belbin FE, Dodd AN** (2018)  
806 The energy-signaling hub SnRK1 is important for sucrose-induced hypocotyl  
807 elongation. *Plant Physiology* **176**: 1299

- 808 **Simon NML, Sawkins E, Dodd AN** (2018) Involvement of the SnRK1 subunit KIN10 in  
809 sucrose-induced hypocotyl elongation. *Plant Signaling & Behavior* **13**: e1457913
- 810 **Somers DE, Devlin PF, Kay SA** (1998) Phytochromes and cryptochromes in the  
811 entrainment of the *Arabidopsis* circadian clock. *Science* **282**: 1488
- 812 **Somers DE, Schultz TF, Milnamow M, Kay SA** (2000) *ZEITLUPE* encodes a novel clock-  
813 associated PAS protein from *Arabidopsis*. *Cell* **101**: 319-329
- 814 **Somers DE, Webb AA, Pearson M, Kay SA** (1998) The short-period mutant, *toc1-1*, alters  
815 circadian clock regulation of multiple outputs throughout development in *Arabidopsis*  
816 *thaliana*. *Development* **125**: 485
- 817 **Strayer C, Oyama T, Schultz TF, Raman R, Somers DE, Más P, Panda S, Kreps JA, Kay**  
818 **SA** (2000) Cloning of the *Arabidopsis* clock gene *TOC1*, an autoregulatory response  
819 regulator homolog. *Science* **289**: 768
- 820 **Streitner C, Danisman S, Wehrle F, Schöning JC, Alfano JR, Staiger D** (2008) The small  
821 glycine-rich RNA binding protein AtGRP7 promotes floral transition in *Arabidopsis*  
822 *thaliana*. *The Plant Journal* **56**: 239-250
- 823 **Thines B, Harmon FG** (2010) Ambient temperature response establishes ELF3 as a  
824 required component of the core *Arabidopsis* circadian clock. *Proceedings of the*  
825 *National Academy of Sciences*: 200911006
- 826 **Tomás M, Medrano H, Escalona JM, Martorell S, Pou A, Ribas-Carbó M, Flexas J**  
827 (2014) Variability of water use efficiency in grapevines. *Environmental and*  
828 *Experimental Botany* **103**: 148-157
- 829 **Vialet-Chabrand S, Matthews JSA, Brendel O, Blatt MR, Wang Y, Hills A, Griffiths H,**  
830 **Rogers S, Lawson T** (2016) Modelling water use efficiency in a dynamic  
831 environment: An example using *Arabidopsis thaliana*. *Plant Science* **251**: 65-74
- 832 **Wahl V, Ponnu J, Schlereth A, Arrivault S, Langenecker T, Franke A, Feil R, Lunn JE,**  
833 **Stitt M, Schmid M** (2013) Regulation of flowering by trehalose-6-phosphate  
834 signaling in *Arabidopsis thaliana*. *Science* **339**: 704
- 835 **Wang Y, Liu K, Liao H, Zhuang C, Ma H, Yan X** (2008) The plant WNK gene family and  
836 regulation of flowering time in *Arabidopsis*. *Plant Biology* **10**: 548-562
- 837 **Wang ZY, Tobin EM** (1998) Constitutive expression of the CIRCADIAN CLOCK  
838 ASSOCIATED 1 (CCA1) gene disrupts circadian rhythms and suppresses its own  
839 expression. *Cell* **93**: 1207-1217
- 840 **Wituszyńska W, Ślesak I, Vanderauwera S, Szechyńska-Hebda M, Kornaś A, Van Der**  
841 **Kelen K, Mühlenbock P, Karpińska B, Maćkowski S, Van Breusegem F,**  
842 **Karpiński S** (2013) LESION SIMULATING DISEASE1, ENHANCED DISEASE  
843 SUSCEPTIBILITY1, and PHYTOALEXIN DEFICIENT4 conditionally regulate cellular  
844 signaling homeostasis, photosynthesis, water use efficiency, and seed yield in  
845 *Arabidopsis*. *Plant Physiology* **161**: 1795
- 846 **Woodward FI, Lake JA, Quick WP** (2002) Stomatal development and CO<sub>2</sub>: ecological  
847 consequences. *New Phytologist* **153**: 477-484
- 848 **Xoconostle-Cazares B, Ramirez-Ortega FA, Flores-Elenes L, Ruiz-Medrano R** (2010)  
849 Drought tolerance in crop plants. *American Journal of Plant Physiology* **5**: 241-256
- 850 **Yamamoto Y, Sato E, Shimizu T, Nakamich N, Sato S, Kato T, Tabata S, Nagatani A,**  
851 **Yamashino T, Mizuno T** (2003) Comparative genetic studies on the APRR5 and  
852 APRR7 genes belonging to the APRR1/TOC1 quintet implicated in circadian rhythm,  
853 control of flowering time, and early photomorphogenesis. *Plant and Cell Physiology*  
854 **44**: 1119-1130
- 855 **Yang Y, Costa A, Leonhardt N, Siegel RS, Schroeder JI** (2008) Isolation of a strong  
856 *Arabidopsis* guard cell promoter and its potential as a research tool. *Plant Methods*  
857 **4**: 6
- 858 **Yanovsky MJ, Kay SA** (2002) Molecular basis of seasonal time measurement in  
859 *Arabidopsis*. *Nature* **419**: 308
- 860 **Yoo CY, Pence HE, Hasegawa PM, Mickelbart MV** (2009) Regulation of transpiration to  
861 improve crop water use. *Critical Reviews in Plant Sciences* **28**: 410-431

- 862 **Yoo CY, Pence HE, Jin JB, Miura K, Gosney MJ, Hasegawa PM, Mickelbart MV** (2010)  
863 The Arabidopsis GTL1 transcription factor regulates water use efficiency and drought  
864 tolerance by modulating stomatal density via transrepression of *SDD1*. *The Plant*  
865 *Cell* **22**: 4128
- 866 **Zagotta MT, Shannon S, Jacobs C, Meeks-Wagner DR** (1992) Early-flowering mutants of  
867 *Arabidopsis thaliana*. *Functional Plant Biology* **19**: 411-418
- 868 **Zielinski T, Moore AM, Troup E, Halliday KJ, Millar AJ** (2014) Strengths and limitations of  
869 period estimation methods for circadian data. *PLOS ONE* **9**: e96462
- 870
- 871
- 872

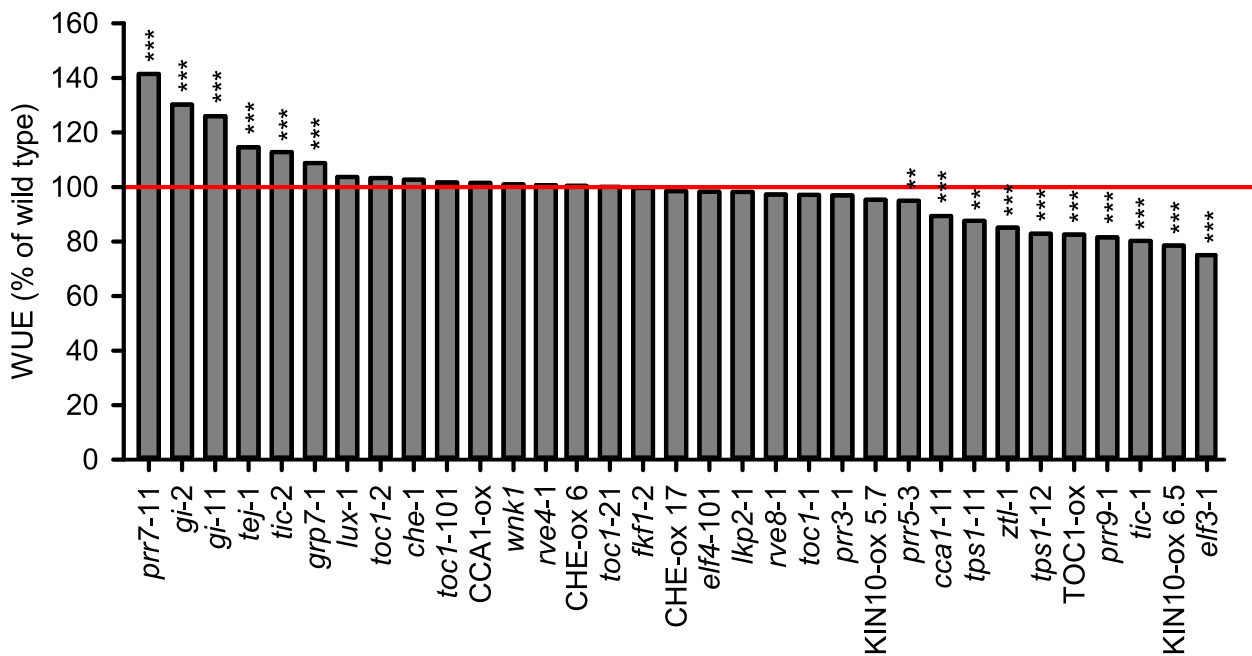

**Figure 1.** The circadian clock regulates long-term water use efficiency of *Arabidopsis* under light/dark cycles. The WUE of circadian clock mutants and overexpressors is expressed as a percentage of their respective background (normalized to 100%, red reference line) to account for WUE variation between background accessions ( $n = 5 - 15$ ). Data were analysed using independent-samples t-tests and statistical significance is indicated relative to the background using ( $* = p < 0.05$ ;  $** = p < 0.01$ ;  $*** = p < 0.001$ ). Statistical analysis was performed on raw data, with data subsequently converted to a percentage of the wild type for the purposes of comparison and presentation. Screens were repeated independently three times per genotype, with one representative experimental repeat shown here for each genotype.

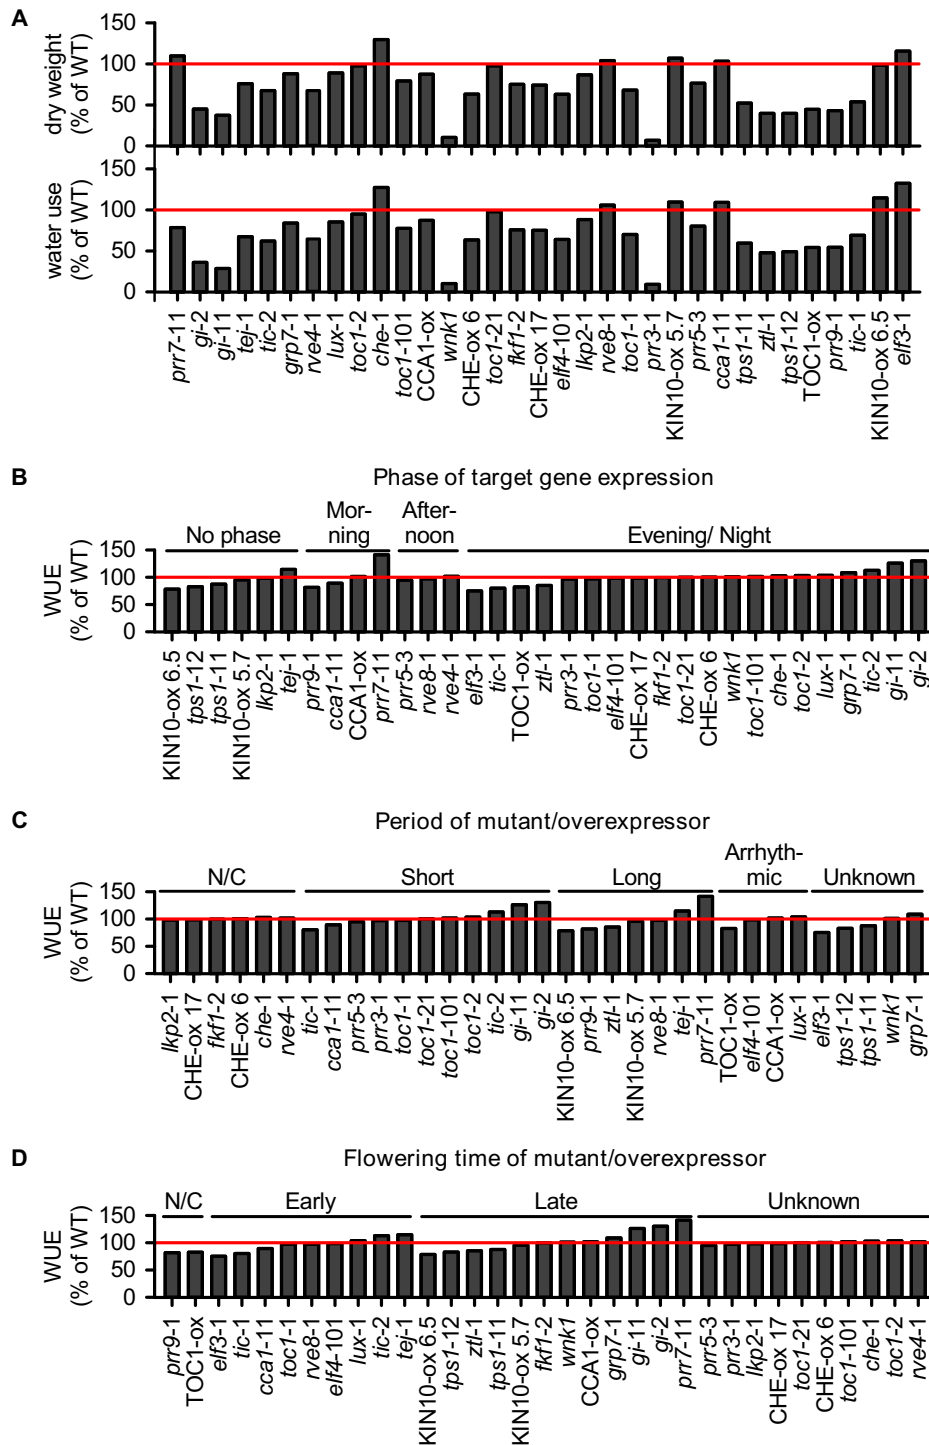

**Figure 2.** Altered WUE of plants with mutations or overexpression of circadian clock associated genes is not caused consistently by variation in one of dry weight, water use, phase of expression of each gene, or resultant altered period or flowering time. Data are derived from Fig. 1 and expressed as a percentage of the respective background (WT, normalised to 100%, red reference line) ( $n = 5 - 15$ ). (A) Altered WUE is not specifically due to altered water use or altered dry weight of screened genotypes, but results from the combination of both. (b-d) Variations in WUE are not explained by (B) phase expression of mutated/overexpressed gene, nor by altered (C) period or (D) flowering time of the mutated/overexpressor genotype. Genotypes reported to have no change (N/C) in period or flowering time relative to the wild type are included on the left of panels (B) and (C), while



those for which period and/or flowering time are unknown are included on the right. Studies describing the phase of expression, period and flowering time of the genotypes tested are identified in the main text. We note that the phase of expression and period data used for this analysis were often obtained under constant conditions, in contrast to our experiments occurring under light/dark cycles.

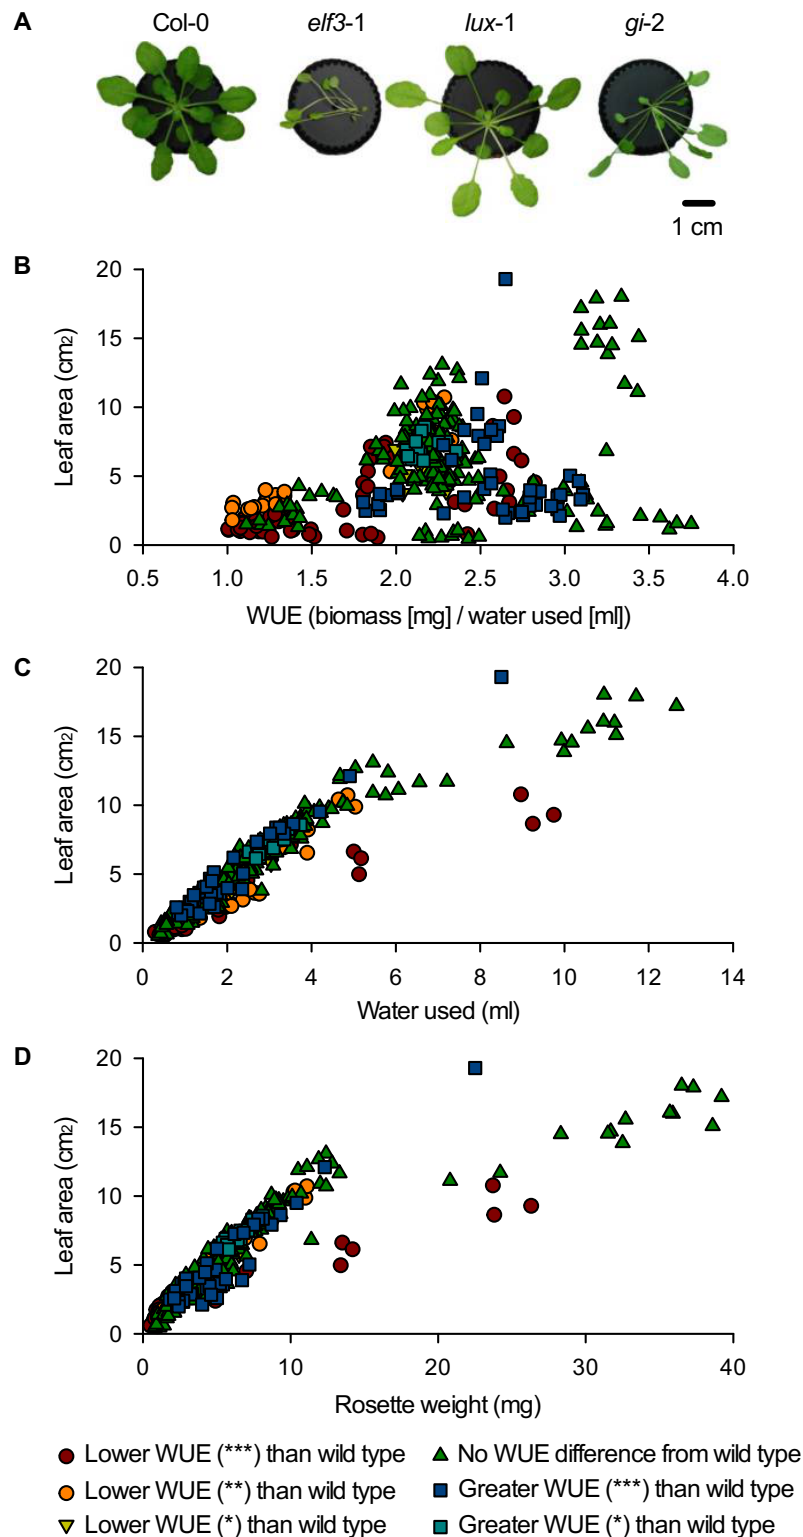

**Figure 3.** The circadian oscillator alters WUE partially by changing rosette architecture. (A) Altering circadian-associated gene expression can affect rosette architecture and size, as illustrated for *elf3-1*, *lux-1*, and *gi-2* in (Col-0 background). Image backgrounds removed for clarity. Variation in rosette leaf surface area across the genotypes investigated explained (B) 16% of variation in WUE ( $p < 0.001$ ,  $r = 0.400$ ,  $r^2 = 0.160$ ), (C) 83% of variation in transpiration ( $p < 0.001$ ,  $r = 0.912$ ,  $r^2 = 0.832$ ) and (D) 73% of variation in rosette dry biomass ( $p < 0.001$ ,  $r = 0.857$ ,  $r^2 = 0.734$ ). Data were analysed using Pearson correlation tests.



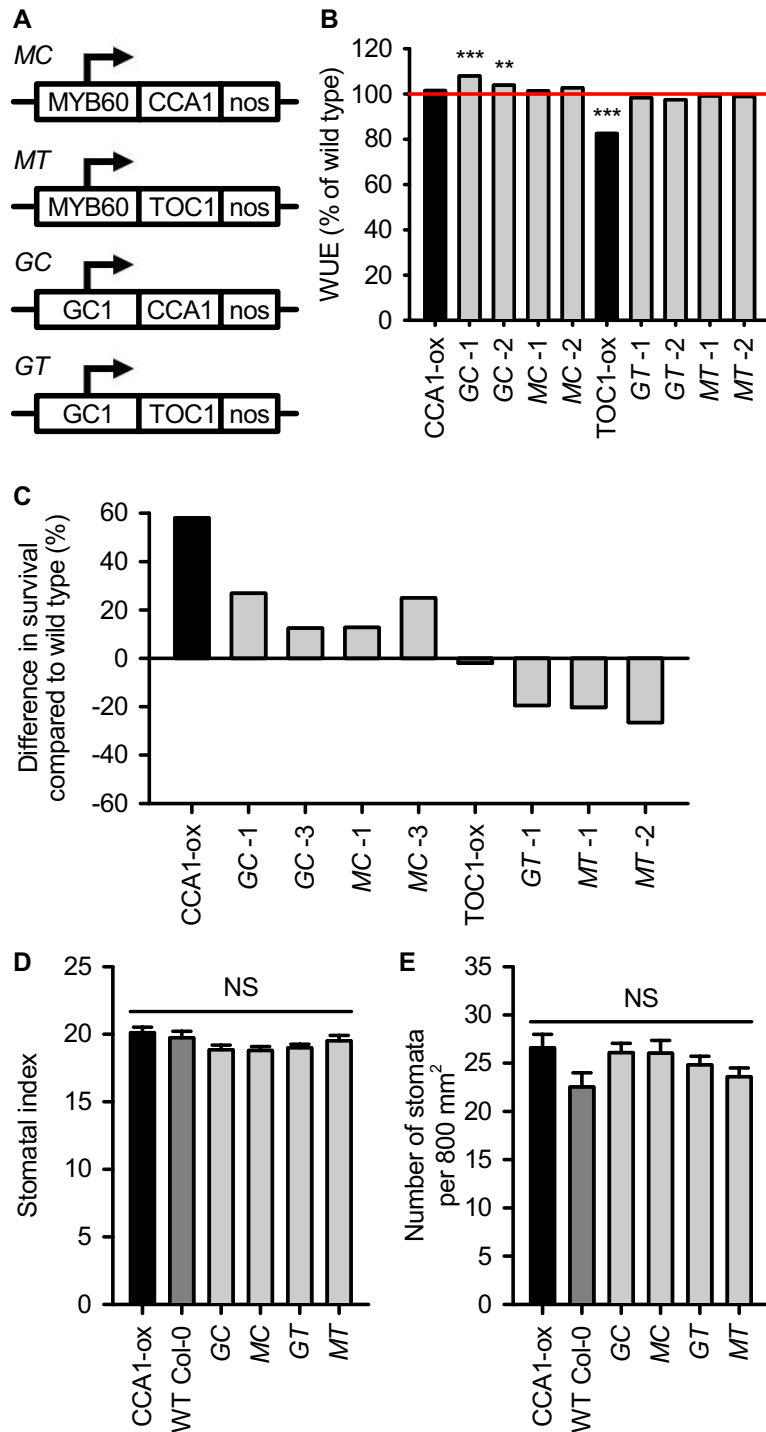

**Figure 4.** Overexpressing *CCA1* or *TOC1* in guard cells affects WUE and survival of dehydration by seedlings. (A) Constructs used to overexpress *CCA1* or *TOC1* coding sequence under control of *GC1* or *MYB60* promoters. (B) Guard cell *CCA1* overexpression can increase WUE. WUE expressed as a percentage of the wild type (normalised to 100%, red reference line). Two to four independent experimental repeats were performed, with data from one representative dataset shown ( $n = 5 - 15$ ). Data for *CCA1-ox* and *TOC1-ox* are derived from Fig. 1, for purposes of comparison. Data were analysed with independent samples t-tests, and statistical significance compared to Col-0 is indicated using starring (\*\* =  $p < 0.01$ ; \*\*\* =  $p < 0.001$ ). (C) Guard cell *CCA1* or *TOC1* overexpression alters dehydration survival of seedlings compared with the wild type. Data were obtained from three independent experimental repeats (mean;  $n = 32$  per experimental replicate; at least

two independent experimental repeats were performed for each genotype). A single *GC1::TOC1* line is shown here because other lines produced extremely variable data. (D, E) Guard cell *CCA1* or *TOC1* overexpression does not affect (D) stomatal index nor (E) stomatal density. Two independent experimental repeats were performed, with data from one representative dataset shown ( $n = 19 - 32$ ; mean  $\pm$  S.E.M.). Data were analysed with ANOVA and Tukey's post hoc tests (NS =  $p > 0.05$ ). Bar colours identify the whole plant overexpressor control (black), wild type control (dark grey), and guard cell-specific overexpressor genotypes (light grey).

## Parsed Citations

**Baena-González E, Rolland F, Thevelein JM, Sheen J (2007) A central integrator of transcription networks in plant stress and energy signalling. *Nature* 448: 938**

Pubmed: [Author and Title](#)

Google Scholar: [Author Only](#) [Title Only](#) [Author and Title](#)

**Baudry A, Ito S, Song YH, Strait AA, Kiba T, Lu S, Henriques R, Pruneda-Paz JL, Chua N-H, Tobin EM, Kay SA, Imaizumi T (2010) F-Box proteins FKF1 and LKP2 act in concert with ZEITLUPE to control Arabidopsis clock progression. *The Plant Cell* 22: 606**

Pubmed: [Author and Title](#)

Google Scholar: [Author Only](#) [Title Only](#) [Author and Title](#)

**Bauer H, Ache P, Lautner S, Fromm J, Hartung W, Al-Rasheid Khaled AS, Sonnewald S, Sonnewald U, Kneitz S, Lachmann N, Mendel Ralf R, Bittner F, Hetherington Alistair M, Hedrich R (2013) The stomatal response to reduced relative humidity requires guard cell-autonomous ABA synthesis. *Current Biology* 23: 53-57**

Pubmed: [Author and Title](#)

Google Scholar: [Author Only](#) [Title Only](#) [Author and Title](#)

**Blum A (2009) Effective use of water (EUW) and not water-use efficiency (WUE) is the target of crop yield improvement under drought stress. *Field Crops Research* 112: 119-123**

Pubmed: [Author and Title](#)

Google Scholar: [Author Only](#) [Title Only](#) [Author and Title](#)

**Bridge LJ, Franklin KA, Homer ME (2013) Impact of plant shoot architecture on leaf cooling: a coupled heat and mass transfer model. *Journal of The Royal Society Interface* 10: 20130326**

Pubmed: [Author and Title](#)

Google Scholar: [Author Only](#) [Title Only](#) [Author and Title](#)

**Caine RS, Yin X, Sloan J, Harrison EL, Mohammed U, Fulton T, Biswal AK, Dionora J, Chater CC, Coe RA, Bandyopadhyay A, Murchie EH, Swarup R, Quick WP, Gray JE (2019) Rice with reduced stomatal density conserves water and has improved drought tolerance under future climate conditions. *New Phytologist* 221: 371-384**

Pubmed: [Author and Title](#)

Google Scholar: [Author Only](#) [Title Only](#) [Author and Title](#)

**Cano-Ramirez DL, Saskia de Fraine T, Griffiths OG, Dodd AN (2018) Photosynthesis and circadian rhythms regulate the buoyancy of marimo lake balls. *Current Biology* 28: R869-R870**

Pubmed: [Author and Title](#)

Google Scholar: [Author Only](#) [Title Only](#) [Author and Title](#)

**Cominelli E, Galbiati M, Albertini A, Fornara F, Conti L, Coupland G, Tonelli C (2011) DOF-binding sites additively contribute to guard cell-specificity of AtMYB60 promoter. *BMC Plant Biology* 11: article 162**

Pubmed: [Author and Title](#)

Google Scholar: [Author Only](#) [Title Only](#) [Author and Title](#)

**Cominelli E, Galbiati M, Vavasseur A, Conti L, Sala T, Vuylsteke M, Leonhardt N, Dellaporta SL, Tonelli C (2005) A guard-cell-specific MYB transcription factor regulates stomatal movements and plant drought tolerance. *Current Biology* 15: 1196-1200**

Pubmed: [Author and Title](#)

Google Scholar: [Author Only](#) [Title Only](#) [Author and Title](#)

**Condon AG, Farquhar GD, Rebetzke GJ, Richards RA (2004) Breeding for high water-use efficiency. *Journal of Experimental Botany* 55: 2447-2460**

Pubmed: [Author and Title](#)

Google Scholar: [Author Only](#) [Title Only](#) [Author and Title](#)

**Costa JM, Monnet F, Jannaud D, Leonhardt N, Ksas B, Reiter IM, Pantin F, Genty B (2015) OPEN ALL NIGHT LONG: The dark side of stomatal control. *Plant Physiology* 167: 289**

Pubmed: [Author and Title](#)

Google Scholar: [Author Only](#) [Title Only](#) [Author and Title](#)

**CoupeL-Ledru A, Lebon E, Christophe A, Gallo A, Gago P, Pantin F, Doligez A, Simonneau T (2016) Reduced nighttime transpiration is a relevant breeding target for high water-use efficiency in grapevine. *Proceedings of the National Academy of Sciences* 113: 8963**

Pubmed: [Author and Title](#)

Google Scholar: [Author Only](#) [Title Only](#) [Author and Title](#)

**Covington MF, Panda S, Liu XL, Strayer CA, Wagner DR, Kay SA (2001) ELF3 modulates resetting of the circadian clock in Arabidopsis. *The Plant Cell* 13: 1305**

Pubmed: [Author and Title](#)

Google Scholar: [Author Only](#) [Title Only](#) [Author and Title](#)

**Delatte TL, Sedijani P, Kondou Y, Matsui M, de Jong GJ, Somsen GW, Wiese-Klinkenberg A, Primavesi LF, Paul MJ, Schluepmann H (2011) Growth arrest by trehalose-6-phosphate: An astonishing case of primary metabolite control over growth by way of the SnRK1 signaling pathway. *Plant Physiology* 157: 160**

Pubmed: [Author and Title](#)

Google Scholar: [Author Only](#) [Title Only](#) [Author and Title](#)

---

Ding Z, Millar AJ, Davis AM, Davis SJ (2007) TIME FOR COFFEE encodes a nuclear regulator in the Arabidopsis thaliana circadian clock. *The Plant Cell* 19: 1522

Pubmed: [Author and Title](#)

Google Scholar: [Author Only Title Only Author and Title](#)

Dixon LE, Knox K, Kozma-Bognar L, Southern MM, Pokhilko A, Millar AJ (2011) Temporal repression of core circadian genes is mediated through EARLY FLOWERING 3 in Arabidopsis. *Current Biology* 21: 120-125

Pubmed: [Author and Title](#)

Google Scholar: [Author Only Title Only Author and Title](#)

Dodd AN, Dalchau N, Gardner MJ, Baek S-J, Webb AAR (2014) The circadian clock has transient plasticity of period and is required for timing of nocturnal processes in Arabidopsis. *New Phytologist* 201: 168-179

Pubmed: [Author and Title](#)

Google Scholar: [Author Only Title Only Author and Title](#)

Dodd AN, Jakobsen MK, Baker AJ, Telzerow A, Hou S-W, Laplace L, Barrot L, Scott Poethig R, Haseloff J, Webb AAR (2006) Time of day modulates low-temperature Ca<sup>2+</sup> signals in Arabidopsis. *The Plant Journal* 48: 962-973

Pubmed: [Author and Title](#)

Google Scholar: [Author Only Title Only Author and Title](#)

Dodd AN, Parkinson K, Webb AAR (2004) Independent circadian regulation of assimilation and stomatal conductance in the ztl-1 mutant of Arabidopsis. *New Phytologist* 162: 63-70

Pubmed: [Author and Title](#)

Google Scholar: [Author Only Title Only Author and Title](#)

Dodd AN, Salathia N, Hall A, Kévei E, Tóth R, Nagy F, Hibberd JM, Millar AJ, Webb AAR (2005) Plant circadian clocks increase photosynthesis, growth, survival, and competitive advantage. *Science* 309: 630

Pubmed: [Author and Title](#)

Google Scholar: [Author Only Title Only Author and Title](#)

Doyle MR, Davis SJ, Bastow RM, McWatters HG, Kozma-Bognár L, Nagy F, Millar AJ, Amasino RM (2002) The ELF4 gene controls circadian rhythms and flowering time in Arabidopsis thaliana. *Nature* 419: 74

Pubmed: [Author and Title](#)

Google Scholar: [Author Only Title Only Author and Title](#)

Edwards CE, Ewers BE, McClung CR, Lou P, Weinig C (2012) Quantitative variation in water-use efficiency across water regimes and its relationship with circadian, vegetative, reproductive, and leaf gas-exchange traits. *Molecular Plant* 5: 653-668

Pubmed: [Author and Title](#)

Google Scholar: [Author Only Title Only Author and Title](#)

Edwards CE, Weinig C (2010) The quantitative-genetic and QTL architecture of trait integration and modularity in Brassica rapa across simulated seasonal settings. *Heredity* 106: 661

Pubmed: [Author and Title](#)

Google Scholar: [Author Only Title Only Author and Title](#)

Endo M, Shimizu H, Nohales MA, Araki T, Kay SA (2014) Tissue-specific clocks in Arabidopsis show asymmetric coupling. *Nature* 515: 419

Pubmed: [Author and Title](#)

Google Scholar: [Author Only Title Only Author and Title](#)

Eriksson ME, Hanano S, Southern MM, Hall A, Millar AJ (2003) Response regulator homologues have complementary, light-dependent functions in the Arabidopsis circadian clock. *Planta* 218: 159-162

Pubmed: [Author and Title](#)

Google Scholar: [Author Only Title Only Author and Title](#)

Farré EM, Harmer SL, Harmon FG, Yanovsky MJ, Kay SA (2005) Overlapping and distinct roles of PRR7 and PRR9 in the Arabidopsis circadian clock. *Current Biology* 15: 47-54

Pubmed: [Author and Title](#)

Google Scholar: [Author Only Title Only Author and Title](#)

Ferguson JN, Humphry M, Lawson T, Brendel O, Bechtold U (2018) Natural variation of life-history traits, water use, and drought responses in Arabidopsis. *Plant Direct* 2: e00035

Pubmed: [Author and Title](#)

Google Scholar: [Author Only Title Only Author and Title](#)

Fowler S, Lee K, Onouchi H, Samach A, Richardson K, Morris B, Coupland G, Putterill J (1999) GIGANTEA: a circadian clock-controlled gene that regulates photoperiodic flowering in Arabidopsis and encodes a protein with several possible membrane-spanning domains. *The EMBO Journal* 18: 4679

Pubmed: [Author and Title](#)

Google Scholar: [Author Only Title Only Author and Title](#)

Francia P, Simoni L, Cominelli E, Tonelli C, Galbiati M (2008) Gene trap-based identification of a guard cell promoter in Arabidopsis. *Plant Signaling & Behavior* 3: 684-686

- Pubmed: [Author and Title](#)  
Google Scholar: [Author Only Title Only Author and Title](#)
- Frank A, Mantioli CC, Viana AJC, Hearn TJ, Kusakina J, Belbin FE, Wells Newman D, Yochikawa A, Cano-Ramirez DL, Chembath A, Cragg-Barber K, Haydon MJ, Hotta CT, Vincentz M, Webb AAR, Dodd AN (2018) Circadian entrainment in Arabidopsis by the sugar-responsive transcription factor bZIP63. Current Biology 28: 2597-2606.e2596**  
Pubmed: [Author and Title](#)  
Google Scholar: [Author Only Title Only Author and Title](#)
- Franks PJ, W. Doheny-Adams T, Britton-Harper ZJ, Gray JE (2015) Increasing water-use efficiency directly through genetic manipulation of stomatal density. New Phytologist 207: 188-195**  
Pubmed: [Author and Title](#)  
Google Scholar: [Author Only Title Only Author and Title](#)
- Galbiati M, Simoni L, Pavesi G, Cominelli E, Francia P, Vavasseur A, Nelson T, Bevan M, Tonelli C (2008) Gene trap lines identify Arabidopsis genes expressed in stomatal guard cells. The Plant Journal 53: 750-762**  
Pubmed: [Author and Title](#)  
Google Scholar: [Author Only Title Only Author and Title](#)
- Gómez LD, Gilday A, Feil R, Lunn JE, Graham IA (2010) AtTPS1-mediated trehalose 6-phosphate synthesis is essential for embryogenic and vegetative growth and responsiveness to ABA in germinating seeds and stomatal guard cells. The Plant Journal 64: 1-13**  
Pubmed: [Author and Title](#)  
Google Scholar: [Author Only Title Only Author and Title](#)
- Gorton HL, Williams WE, Binns ME, Gemmill CN, Leheny EA, Shepherd AC (1989) Circadian stomatal rhythms in epidermal peels from Vicia faba. Plant Physiology 90: 1329**  
Pubmed: [Author and Title](#)  
Google Scholar: [Author Only Title Only Author and Title](#)
- Graf A, Schlereth A, Stitt M, Smith AM (2010) Circadian control of carbohydrate availability for growth in Arabidopsis plants at night. Proceedings of the National Academy of Sciences 107: 9458**  
Pubmed: [Author and Title](#)  
Google Scholar: [Author Only Title Only Author and Title](#)
- Hall A, Bastow RM, Davis SJ, Hanano S, McWatters HG, Hibberd V, Doyle MR, Sung S, Halliday KJ, Amasino RM, Millar AJ (2003) The TIME FOR COFFEE gene maintains the amplitude and timing of Arabidopsis circadian clocks. The Plant Cell 15: 2719**  
Pubmed: [Author and Title](#)  
Google Scholar: [Author Only Title Only Author and Title](#)
- Harmer SL, Hogenesch JB, Straume M, Chang H-S, Han B, Zhu T, Wang X, Kreps JA, Kay SA (2000) Orchestrated transcription of key pathways in Arabidopsis by the circadian clock. Science 290: 2110**  
Pubmed: [Author and Title](#)  
Google Scholar: [Author Only Title Only Author and Title](#)
- Hassidim M, Dakhiya Y, Turjeman A, Hussien D, Shor E, Anidjar A, Goldberg K, Green RM (2017) CIRCADIAN CLOCK ASSOCIATED1 (CCA1) and the circadian control of stomatal aperture. Plant Physiology 175: 1864**  
Pubmed: [Author and Title](#)  
Google Scholar: [Author Only Title Only Author and Title](#)
- Haydon MJ, Mielczarek O, Robertson FC, Hubbard KE, Webb AAR (2013) Photosynthetic entrainment of the Arabidopsis thaliana circadian clock. Nature 502: 689**  
Pubmed: [Author and Title](#)  
Google Scholar: [Author Only Title Only Author and Title](#)
- Hazen SP, Schultz TF, Pruneda-Paz JL, Borevitz JO, Ecker JR, Kay SA (2005) LUX ARRHYTHMO encodes a Myb domain protein essential for circadian rhythms. Proceedings of the National Academy of Sciences of the United States of America 102: 10387**  
Pubmed: [Author and Title](#)  
Google Scholar: [Author Only Title Only Author and Title](#)
- Hellens RP, Edwards EA, Leyland NR, Bean S, Mullineaux PM (2000) pGreen: a versatile and flexible binary Ti vector for Agrobacterium-mediated plant transformation. Plant Molecular Biology 42: 819-832**  
Pubmed: [Author and Title](#)  
Google Scholar: [Author Only Title Only Author and Title](#)
- Hennessey TL, Field CB (1991) Circadian rhythms in photosynthesis. Plant Physiology 96: 831**  
Pubmed: [Author and Title](#)  
Google Scholar: [Author Only Title Only Author and Title](#)
- Herrero E, Kolmos E, Bujdoso N, Yuan Y, Wang M, Berns MC, Uhlworm H, Coupland G, Saini R, Jaskolski M, Webb A, Gonçalves J, Davis SJ (2012) EARLY FLOWERING4 recruitment of EARLY FLOWERING3 in the nucleus sustains the Arabidopsis circadian clock. The Plant Cell 24: 428**  
Pubmed: [Author and Title](#)  
Google Scholar: [Author Only Title Only Author and Title](#)
- Hetherington AM, Woodward FI (2003) The role of stomata in sensing and driving environmental change. Nature 424: 901**

- Pubmed: [Author and Title](#)  
Google Scholar: [Author Only Title Only Author and Title](#)
- Hsu PY, Harmer SL (2014) Wheels within wheels: the plant circadian system. Trends in Plant Science 19: 240-249**  
Pubmed: [Author and Title](#)  
Google Scholar: [Author Only Title Only Author and Title](#)
- Hu H, Xiong L (2014) Genetic engineering and breeding of drought-resistant crops. Annual Review of Plant Biology 65: 715-741**  
Pubmed: [Author and Title](#)  
Google Scholar: [Author Only Title Only Author and Title](#)
- Huang H, Nusinow DA (2016) Into the evening: Complex interactions in the Arabidopsis circadian clock. Trends in Genetics 32: 674-686**  
Pubmed: [Author and Title](#)  
Google Scholar: [Author Only Title Only Author and Title](#)
- Hugouvieux V, Kwak JM, Schroeder JI (2001) An mRNA cap binding protein, ABH1, modulates early abscisic acid signal transduction in Arabidopsis. Cell 106: 477-487**  
Pubmed: [Author and Title](#)  
Google Scholar: [Author Only Title Only Author and Title](#)
- Imaizumi T, Schultz TF, Harmon FG, Ho LA, Kay SA (2005) FKF1 F-Box protein mediates cyclic degradation of a repressor of CONSTANS in Arabidopsis. Science 309: 293**  
Pubmed: [Author and Title](#)  
Google Scholar: [Author Only Title Only Author and Title](#)
- Imaizumi T, Tran HG, Swartz TE, Briggs WR, Kay SA (2003) FKF1 is essential for photoperiodic-specific light signalling in Arabidopsis. Nature 426: 302**  
Pubmed: [Author and Title](#)  
Google Scholar: [Author Only Title Only Author and Title](#)
- Joo Y, Frago V, Yon F, Baldwin IT, Kim S-G (2017) Circadian clock component, LHY, tells a plant when to respond photosynthetically to light in nature. Journal of Integrative Plant Biology 59: 572-587**  
Pubmed: [Author and Title](#)  
Google Scholar: [Author Only Title Only Author and Title](#)
- Karaba A, Dixit S, Greco R, Aharoni A, Trijatmiko KR, Marsch-Martinez N, Krishnan A, Nataraja KN, Udayakumar M, Pereira A (2007) Improvement of water use efficiency in rice by expression of HARDY, an Arabidopsis drought and salt tolerance gene. Proceedings of the National Academy of Sciences 104: 15270**  
Pubmed: [Author and Title](#)  
Google Scholar: [Author Only Title Only Author and Title](#)
- Khanna R, Kikis EA, Quail PH (2003) EARLY FLOWERING 4 functions in Phytochrome B-regulated seedling de-etiolation. Plant Physiology 133: 1530**  
Pubmed: [Author and Title](#)  
Google Scholar: [Author Only Title Only Author and Title](#)
- Kikis EA, Khanna R, Quail PH (2005) ELF4 is a phytochrome-regulated component of a negative-feedback loop involving the central oscillator components CCA1 and LHY. The Plant Journal 44: 300-313**  
Pubmed: [Author and Title](#)  
Google Scholar: [Author Only Title Only Author and Title](#)
- Kim W-Y, Fujiwara S, Suh S-S, Kim J, Kim Y, Han L, David K, Putterill J, Nam HG, Somers DE (2007) ZEITLUPE is a circadian photoreceptor stabilized by GIGANTEA in blue light. Nature 449: 356**  
Pubmed: [Author and Title](#)  
Google Scholar: [Author Only Title Only Author and Title](#)
- Kinoshita T, Hayashi Y (2011) New insights into the regulation of stomatal opening by blue light and plasma membrane H<sup>+</sup>-ATPase. In KW Jeon, ed, International Review of Cell and Molecular Biology, Vol 289. Academic Press, pp 89-115**  
Pubmed: [Author and Title](#)  
Google Scholar: [Author Only Title Only Author and Title](#)
- Kinoshita T, Ono N, Hayashi Y, Morimoto S, Nakamura S, Soda M, Kato Y, Ohnishi M, Nakano T, Inoue S-i, Shimazaki K-i (2011) FLOWERING LOCUS T regulates stomatal opening. Current Biology 21: 1232-1238**  
Pubmed: [Author and Title](#)  
Google Scholar: [Author Only Title Only Author and Title](#)
- Lawson T, Blatt MR (2014) Stomatal size, speed, and responsiveness impact on photosynthesis and water use efficiency. Plant Physiology 164: 1556**  
Pubmed: [Author and Title](#)  
Google Scholar: [Author Only Title Only Author and Title](#)
- Legnaioli T, Cuevas J, Mas P (2009) TOC1 functions as a molecular switch connecting the circadian clock with plant responses to drought. The EMBO Journal 28: 3745**  
Pubmed: [Author and Title](#)  
Google Scholar: [Author Only Title Only Author and Title](#)



- Litthauer S, Battle MW, Lawson T, Jones MA (2015)** Phototropins maintain robust circadian oscillation of PSII operating efficiency under blue light. *The Plant Journal* 83: 1034-1045  
Pubmed: [Author and Title](#)  
Google Scholar: [Author Only](#) [Title Only](#) [Author and Title](#)
- Más P, Kim W-Y, Somers DE, Kay SA (2003)** Targeted degradation of TOC1 by ZTL modulates circadian function in *Arabidopsis thaliana*. *Nature* 426: 567  
Pubmed: [Author and Title](#)  
Google Scholar: [Author Only](#) [Title Only](#) [Author and Title](#)
- Masle J, Gilmore SR, Farquhar GD (2005)** The ERECTA gene regulates plant transpiration efficiency in *Arabidopsis*. *Nature* 436: 866  
Pubmed: [Author and Title](#)  
Google Scholar: [Author Only](#) [Title Only](#) [Author and Title](#)
- Medrano H, Tomás M, Martorell S, Flexas J, Hernández E, Rosselló J, Pou A, Escalona J-M, Bota J (2015)** From leaf to whole-plant water use efficiency (WUE) in complex canopies: Limitations of leaf WUE as a selection target. *The Crop Journal* 3: 220-228  
Pubmed: [Author and Title](#)  
Google Scholar: [Author Only](#) [Title Only](#) [Author and Title](#)
- Meyer S, Mumm P, Imes D, Endler A, Weder B, Al-Rasheid KAS, Geiger D, Marten I, Martinoia E, Hedrich R (2010)** AtALMT12 represents an R-type anion channel required for stomatal movement in *Arabidopsis* guard cells. *The Plant Journal* 63: 1054-1062  
Pubmed: [Author and Title](#)  
Google Scholar: [Author Only](#) [Title Only](#) [Author and Title](#)
- Michael TP, Salomé PA, Yu HJ, Spencer TR, Sharp EL, McPeck MA, Alonso JM, Ecker JR, McClung CR (2003)** Enhanced fitness conferred by naturally occurring variation in the circadian clock. *Science* 302: 1049  
Pubmed: [Author and Title](#)  
Google Scholar: [Author Only](#) [Title Only](#) [Author and Title](#)
- Millar AJ (2004)** Input signals to the plant circadian clock. *Journal of Experimental Botany* 55: 277-283  
Pubmed: [Author and Title](#)  
Google Scholar: [Author Only](#) [Title Only](#) [Author and Title](#)
- Millar AJ, Carre IA, Strayer CA, Chua NH, Kay SA (1995)** Circadian clock mutants in *Arabidopsis* identified by luciferase imaging. *Science* 267: 1161  
Pubmed: [Author and Title](#)  
Google Scholar: [Author Only](#) [Title Only](#) [Author and Title](#)
- Murakami M, Yamashino T, Mizuno T (2004)** Characterization of circadian-associated APRR3 pseudo-response regulator belonging to the APRR1/TOC1 quintet in *Arabidopsis thaliana*. *Plant and Cell Physiology* 45: 645-650  
Pubmed: [Author and Title](#)  
Google Scholar: [Author Only](#) [Title Only](#) [Author and Title](#)
- Na J-K, Metzger JD (2014)** Chimeric promoter mediates guard cell-specific gene expression in tobacco under water deficit. *Biotechnology Letters* 36: 1893-1899  
Pubmed: [Author and Title](#)  
Google Scholar: [Author Only](#) [Title Only](#) [Author and Title](#)
- Nagy R, Grob H, Weder B, Green P, Klein M, Frelet A, Schjoerring JK, Brearley CA, Martinoia E (2009)** The *Arabidopsis* ATP-binding cassette protein ATMRP5/ATABCC5 is a high-affinity inositol hexakisphosphate transporter involved in guard cell signaling and phytate storage. *Journal of Biological Chemistry*  
Pubmed: [Author and Title](#)  
Google Scholar: [Author Only](#) [Title Only](#) [Author and Title](#)
- Nakamichi N, Kiba T, Henriques R, Mizuno T, Chua N-H, Sakakibara H (2010)** PSEUDO-RESPONSE REGULATORS 9, 7, and 5 are transcriptional repressors in *Arabidopsis* circadian clock. *The Plant Cell* 22: 594  
Pubmed: [Author and Title](#)  
Google Scholar: [Author Only](#) [Title Only](#) [Author and Title](#)
- Nakamichi N, Murakami-Kojima M, Sato E, Kishi Y, Yamashino T, Mizuno T (2002)** Compilation and characterization of a novel WNK family of protein kinases in *Arabidopsis thaliana* with reference to circadian rhythms. *Bioscience, Biotechnology, and Biochemistry* 66: 2429-2436  
Pubmed: [Author and Title](#)  
Google Scholar: [Author Only](#) [Title Only](#) [Author and Title](#)
- Nienhuis J, Sills GR, Martin B, King G (1994)** Variance for water-use efficiency among ecotypes and recombinant inbred lines of *Arabidopsis thaliana* (Brassicaceae). *American Journal of Botany* 81: 943-947  
Pubmed: [Author and Title](#)  
Google Scholar: [Author Only](#) [Title Only](#) [Author and Title](#)
- Nietzsche M, Guerra T, Aiseekh S, Wiermer M, Sonnewald S, Fernie AR, Börnke F (2018)** STOREKEEPER RELATED1/G-element binding protein (STKR1) interacts with protein kinase SnRK1. *Plant Physiology* 176: 1773  
Pubmed: [Author and Title](#)  
Google Scholar: [Author Only](#) [Title Only](#) [Author and Title](#)

Noordally ZB, Ishii K, Atkins KA, Wetherill SJ, Kusakina J, Walton EJ, Kato M, Azuma M, Tanaka K, Hanaoka M, Dodd AN (2013) Circadian control of chloroplast transcription by a nuclear-encoded timing signal. *Science* 339: 1316

Pubmed: [Author and Title](#)

Google Scholar: [Author Only](#) [Title Only](#) [Author and Title](#)

Panda S, Poirier GG, Kay SA (2002) *tej* defines a role for poly(ADP-ribosylation) in establishing period length of the Arabidopsis circadian oscillator. *Developmental Cell* 3: 51-61

Pubmed: [Author and Title](#)

Google Scholar: [Author Only](#) [Title Only](#) [Author and Title](#)

Paul MJ, Jhurrea D, Zhang Y, Primavesi LF, Delatte T, Schlupepmann H, Wingler A (2010) Up-regulation of biosynthetic processes associated with growth by trehalose 6-phosphate. *Plant Signaling & Behavior* 5: 386-392

Pubmed: [Author and Title](#)

Google Scholar: [Author Only](#) [Title Only](#) [Author and Title](#)

Pei Z-M, Ghassemian M, Kwak CM, McCourt P, Schroeder JI (1998) Role of farnesyltransferase in ABA regulation of guard cell anion channels and plant water loss. *Science* 282: 287

Pubmed: [Author and Title](#)

Google Scholar: [Author Only](#) [Title Only](#) [Author and Title](#)

Pruneda-Paz JL, Breton G, Para A, Kay SA (2009) A functional genomics approach reveals CHE as a component of the Arabidopsis circadian clock. *Science* 323: 1481

Pubmed: [Author and Title](#)

Google Scholar: [Author Only](#) [Title Only](#) [Author and Title](#)

Rawat R, Takahashi N, Hsu PY, Jones MA, Schwartz J, Salemi MR, Phinney BS, Harmer SL (2011) REVEILLE8 and PSEUDO-REPONSE REGULATOR5 form a negative feedback loop within the Arabidopsis circadian clock. *PLOS Genetics* 7: e1001350

Pubmed: [Author and Title](#)

Google Scholar: [Author Only](#) [Title Only](#) [Author and Title](#)

Resco de Dios V, Gessler A, Pedro Ferrio J, Alday JG, Bahn M, del Castillo J, Devidal S, García-Muñoz S, Kayler Z, Landais D, Martín-Gómez P, Milcu A, Piel C, Pirhofer-Walzl K, Ravel O, Salekin S, Tissue DT, Tjoelker MG, Voltas J, Roy J (2016) Circadian rhythms have significant effects on leaf-to-canopy scale gas exchange under field conditions. *GigaScience* 5

Pubmed: [Author and Title](#)

Google Scholar: [Author Only](#) [Title Only](#) [Author and Title](#)

Rubin MJ, Brock MT, Baker RL, Wilcox S, Anderson K, Davis SJ, Weinig C (2018) Circadian rhythms are associated with shoot architecture in natural settings. *New Phytologist* 219: 246-258

Pubmed: [Author and Title](#)

Google Scholar: [Author Only](#) [Title Only](#) [Author and Title](#)

Ruggiero A, Punzo P, Landi S, Costa A, Van Oosten JM, Grillo S (2017) Improving plant water use efficiency through molecular genetics. *Horticulturae* 3

Pubmed: [Author and Title](#)

Google Scholar: [Author Only](#) [Title Only](#) [Author and Title](#)

Rusconi F, Simoni L, Simeoni F, Tonelli C, Galbiati M, Cominelli E, Conti L, Riboni M, Francia P, Martin CR (2013) The Arabidopsis thaliana MYB60 promoter provides a tool for the spatio-temporal control of gene expression in stomatal guard cells. *Journal of Experimental Botany* 64: 3361-3371

Pubmed: [Author and Title](#)

Google Scholar: [Author Only](#) [Title Only](#) [Author and Title](#)

Ruts T, Matsubara S, Wiese-Klinkenberg A, Walter A (2012) Aberrant temporal growth pattern and morphology of root and shoot caused by a defective circadian clock in Arabidopsis thaliana. *The Plant Journal* 72: 154-161

Pubmed: [Author and Title](#)

Google Scholar: [Author Only](#) [Title Only](#) [Author and Title](#)

Salomé PA, McClung CR (2005) PSEUDO-RESPONSE REGULATOR 7 and 9 are partially redundant genes essential for the temperature responsiveness of the Arabidopsis circadian clock. *The Plant Cell* 17: 791

Pubmed: [Author and Title](#)

Google Scholar: [Author Only](#) [Title Only](#) [Author and Title](#)

Schaffer R, Ramsay N, Samach A, Corden S, Putterill J, Carré IA, Coupland G (1998) The late elongated hypocotyl mutation of Arabidopsis disrupts circadian rhythms and the photoperiodic control of flowering. *Cell* 93: 1219-1229

Pubmed: [Author and Title](#)

Google Scholar: [Author Only](#) [Title Only](#) [Author and Title](#)

Schroeder JI, Allen GJ, Hugouvieux V, Kwak JM, Waner D (2001) Guard cell signal transduction. *Annual Review of Plant Physiology and Plant Molecular Biology* 52: 627-658

Pubmed: [Author and Title](#)

Google Scholar: [Author Only](#) [Title Only](#) [Author and Title](#)

Schultz TF, Kiyosue T, Yanovsky M, Wada M, Kay SA (2001) A Role for LKP2 in the Circadian Clock of Arabidopsis. *The Plant Cell* 13: 2659



- Pubmed: [Author and Title](#)  
Google Scholar: [Author Only Title Only Author and Title](#)
- Shin J, Sánchez-Villarreal A, Davis AM, Du S-x, Berendzen KW, Koncz C, Ding Z, Li C, Davis SJ (2017) The metabolic sensor AKIN10 modulates the Arabidopsis circadian clock in a light-dependent manner. Plant, Cell & Environment 40: 997-1008**  
Pubmed: [Author and Title](#)  
Google Scholar: [Author Only Title Only Author and Title](#)
- Simon NML, Kusakina J, Fernández-López Á, Chembath A, Belbin FE, Dodd AN (2018) The energy-signaling hub SnRK1 is important for sucrose-induced hypocotyl elongation. Plant Physiology 176: 1299**  
Pubmed: [Author and Title](#)  
Google Scholar: [Author Only Title Only Author and Title](#)
- Simon NML, Sawkins E, Dodd AN (2018) Involvement of the SnRK1 subunit KIN10 in sucrose-induced hypocotyl elongation. Plant Signaling & Behavior 13: e1457913**  
Pubmed: [Author and Title](#)  
Google Scholar: [Author Only Title Only Author and Title](#)
- Somers DE, Devlin PF, Kay SA (1998) Phytochromes and cryptochromes in the entrainment of the Arabidopsis circadian clock. Science 282: 1488**  
Pubmed: [Author and Title](#)  
Google Scholar: [Author Only Title Only Author and Title](#)
- Somers DE, Schultz TF, Milnamow M, Kay SA (2000) ZEITLUPE encodes a novel clock-associated PAS protein from Arabidopsis. Cell 101: 319-329**  
Pubmed: [Author and Title](#)  
Google Scholar: [Author Only Title Only Author and Title](#)
- Somers DE, Webb AA, Pearson M, Kay SA (1998) The short-period mutant, toc1-1, alters circadian clock regulation of multiple outputs throughout development in Arabidopsis thaliana. Development 125: 485**  
Pubmed: [Author and Title](#)  
Google Scholar: [Author Only Title Only Author and Title](#)
- Strayer C, Oyama T, Schultz TF, Raman R, Somers DE, Más P, Panda S, Kreps JA, Kay SA (2000) Cloning of the Arabidopsis clock gene TOC1, an autoregulatory response regulator homolog. Science 289: 768**  
Pubmed: [Author and Title](#)  
Google Scholar: [Author Only Title Only Author and Title](#)
- Streitner C, Danisman S, Wehrle F, Schöning JC, Alfano JR, Staiger D (2008) The small glycine-rich RNA binding protein AtGRP7 promotes floral transition in Arabidopsis thaliana. The Plant Journal 56: 239-250**  
Pubmed: [Author and Title](#)  
Google Scholar: [Author Only Title Only Author and Title](#)
- Thines B, Harmon FG (2010) Ambient temperature response establishes ELF3 as a required component of the core Arabidopsis circadian clock. Proceedings of the National Academy of Sciences: 200911006**  
Pubmed: [Author and Title](#)  
Google Scholar: [Author Only Title Only Author and Title](#)
- Tomás M, Medrano H, Escalona JM, Martorell S, Pou A, Ribas-Carbó M, Flexas J (2014) Variability of water use efficiency in grapevines. Environmental and Experimental Botany 103: 148-157**  
Pubmed: [Author and Title](#)  
Google Scholar: [Author Only Title Only Author and Title](#)
- Vialet-Chabrand S, Matthews JSA, Brendel O, Blatt MR, Wang Y, Hills A, Griffiths H, Rogers S, Lawson T (2016) Modelling water use efficiency in a dynamic environment: An example using Arabidopsis thaliana. Plant Science 251: 65-74**  
Pubmed: [Author and Title](#)  
Google Scholar: [Author Only Title Only Author and Title](#)
- Wahl V, Ponnu J, Schlereth A, Arrivault S, Langenecker T, Franke A, Feil R, Lunn JE, Stitt M, Schmid M (2013) Regulation of flowering by trehalose-6-phosphate signaling in Arabidopsis thaliana. Science 339: 704**  
Pubmed: [Author and Title](#)  
Google Scholar: [Author Only Title Only Author and Title](#)
- Wang Y, Liu K, Liao H, Zhuang C, Ma H, Yan X (2008) The plant WNK gene family and regulation of flowering time in Arabidopsis. Plant Biology 10: 548-562**  
Pubmed: [Author and Title](#)  
Google Scholar: [Author Only Title Only Author and Title](#)
- Wang ZY, Tobin EM (1998) Constitutive expression of the CIRCADIAN CLOCK ASSOCIATED 1 (CCA1) gene disrupts circadian rhythms and suppresses its own expression. Cell 93: 1207-1217**  
Pubmed: [Author and Title](#)  
Google Scholar: [Author Only Title Only Author and Title](#)
- Wituszyńska W, Ślesak I, Vanderauwera S, Szechyńska-Hebda M, Kornaś A, Van Der Kelen K, Mühlenbock P, Karpińska B, Maćkowski S, Van Breusegem F, Karpiński S (2013) LESION SIMULATING DISEASE1, ENHANCED DISEASE SUSCEPTIBILITY1, and**

**PHYTOALEXIN DEFICIENT4 conditionally regulate cellular signaling homeostasis, photosynthesis, water use efficiency, and seed yield in Arabidopsis. Plant Physiology 161: 1795**

Pubmed: [Author and Title](#)

Google Scholar: [Author Only](#) [Title Only](#) [Author and Title](#)

**Woodward FI, Lake JA, Quick WP (2002) Stomatal development and CO<sub>2</sub>: ecological consequences. New Phytologist 153: 477-484**

Pubmed: [Author and Title](#)

Google Scholar: [Author Only](#) [Title Only](#) [Author and Title](#)

**Xoconostle-Cazares B, Ramirez-Ortega FA, Flores-Elenes L, Ruiz-Medrano R (2010) Drought tolerance in crop plants. American Journal of Plant Physiology 5: 241-256**

Pubmed: [Author and Title](#)

Google Scholar: [Author Only](#) [Title Only](#) [Author and Title](#)

**Yamamoto Y, Sato E, Shimizu T, Nakamich N, Sato S, Kato T, Tabata S, Nagatani A, Yamashino T, Mizuno T (2003) Comparative genetic studies on the APRR5 and APRR7 genes belonging to the APRR1/TOC1 quintet implicated in circadian rhythm, control of flowering time, and early photomorphogenesis. Plant and Cell Physiology 44: 1119-1130**

Pubmed: [Author and Title](#)

Google Scholar: [Author Only](#) [Title Only](#) [Author and Title](#)

**Yang Y, Costa A, Leonhardt N, Siegel RS, Schroeder JI (2008) Isolation of a strong Arabidopsis guard cell promoter and its potential as a research tool. Plant Methods 4: 6**

Pubmed: [Author and Title](#)

Google Scholar: [Author Only](#) [Title Only](#) [Author and Title](#)

**Yanovsky MJ, Kay SA (2002) Molecular basis of seasonal time measurement in Arabidopsis. Nature 419: 308**

Pubmed: [Author and Title](#)

Google Scholar: [Author Only](#) [Title Only](#) [Author and Title](#)

**Yoo CY, Pence HE, Hasegawa PM, Mickelbart MV (2009) Regulation of transpiration to improve crop water use. Critical Reviews in Plant Sciences 28: 410-431**

Pubmed: [Author and Title](#)

Google Scholar: [Author Only](#) [Title Only](#) [Author and Title](#)

**Yoo CY, Pence HE, Jin JB, Miura K, Gosney MJ, Hasegawa PM, Mickelbart MV (2010) The Arabidopsis GTL1 transcription factor regulates water use efficiency and drought tolerance by modulating stomatal density via transrepression of SDD1. The Plant Cell 22: 4128**

Pubmed: [Author and Title](#)

Google Scholar: [Author Only](#) [Title Only](#) [Author and Title](#)

**Zagotta MT, Shannon S, Jacobs C, Meeks-Wagner DR (1992) Early-flowering mutants of Arabidopsis thaliana. Functional Plant Biology 19: 411-418**

Pubmed: [Author and Title](#)

Google Scholar: [Author Only](#) [Title Only](#) [Author and Title](#)

**Zielinski T, Moore AM, Troup E, Halliday KJ, Millar AJ (2014) Strengths and limitations of period estimation methods for circadian data. PLOS ONE 9: e96462**

Pubmed: [Author and Title](#)

Google Scholar: [Author Only](#) [Title Only](#) [Author and Title](#)
